# Supplementary material for: Rev Protein Diversity in HIV-1 Group M Clades
Source: MDPI journal article supplement (doi:10.3390/v16050759), 2024-05-10
Supplement: s1 [file s1]

**Supplementary Table S6.** Range of conservation of individual Rev domain across different HIV-1 group M clades.

| Clade <sup>a</sup> | Conservation (%) |             |           |           |             |                  |                            |                                |                               |                  |                        |     |
|--------------------|------------------|-------------|-----------|-----------|-------------|------------------|----------------------------|--------------------------------|-------------------------------|------------------|------------------------|-----|
|                    | 64.5 – 72.1      | 72.2 – 74.9 | 75.0-77.9 | 78.0-80.9 | 81.0-83.9   | 84.0-86.9        | 87.0-89.9                  | 90.0-92.9                      | 93.0-95.9                     | 96.0-98.9        | 99.0-100               |     |
| Group M            | C-term           |             |           | Turn      | OD2, ONL    | NES              | N-term, OD1                |                                | ARM                           |                  |                        |     |
| A1                 |                  |             |           |           | C-term      | Turn             | OD1                        | N-term, OD2, NES               |                               | ARM              |                        |     |
| A6                 |                  |             |           |           |             |                  | OD2, ONL                   | N-term, OD1, Turn, ARM, C-term |                               | NES              |                        |     |
| B                  | OD2              |             |           |           | ONL         | OD1, C-term      | Turn                       |                                |                               | N-term           | ARM, NES               |     |
| C                  |                  |             |           |           | C-term      | ONL              | OD2                        | Turn, NES                      |                               | N-term, OD1, ARM |                        |     |
| D                  |                  |             |           |           |             |                  | OD1, C-term                | N-term, OD2, NES, Turn         |                               | ONL              | ARM                    |     |
| F1                 |                  |             |           |           |             | C-term           | N-term, OD1, OD2, ONL, NES |                                | Turn                          |                  | ARM                    |     |
| F2                 |                  |             |           |           | ONL, C-term |                  |                            | OD2                            | N-term, Turn, NES, OD1        |                  | ARM                    |     |
| G                  |                  |             |           |           |             | ONL, C-term      | OD1, OD2, NES              |                                | N-term, Turn                  |                  | ARM                    |     |
| H                  |                  |             |           |           |             |                  | N-term, OD1, OD2, ONL      | Turn, C-term                   |                               | ARM, NES         |                        |     |
| 01_AE              |                  |             |           |           |             |                  | Turn, ONL                  | OD2, C-term                    | OD1, ARM, NES                 |                  | N-term                 |     |
| 02_AG              |                  |             |           |           | C-term      | OD2, ONL         | OD1, NES                   | N-term, Turn                   |                               | ARM              |                        |     |
| 06_cpx             |                  |             |           |           |             |                  | Turn                       | ONL                            | N-term, OD1, OD2, NES, C-term |                  | ARM                    |     |
| 07_BC              |                  |             |           |           |             |                  | N-term                     | C-term                         | OD1, OD2, ONL, NES            |                  | Turn<br>ARM            |     |
| 08_BC              |                  |             |           |           |             |                  |                            |                                | ARM, C-term                   | Turn, OD2, ONL   | N-term, OD1, NES       |     |
| 11_cpx             |                  |             |           |           | Turn        | OD1, ONL, C-term |                            | OD2, NES                       |                               | N-term           |                        |     |
| 12_BF              |                  |             |           |           |             |                  |                            | N-term, OD1, OD2, ONL          | Turn, C-term                  |                  | ARM, NES               |     |
| 13_cpx             |                  |             |           |           |             |                  | OD1, OD2, C-term           | Turn                           | ONL, NES                      |                  | N-term                 | ARM |
| 14_BG              |                  |             |           |           |             |                  |                            |                                | OD1, ONL                      | OD2, C-term      | N-term, Turn, ARM, NES |     |
| 22_01A1            |                  |             |           |           |             | Turn, ONL        |                            | OD1, NES                       | N-term, C-term                |                  | ARM, OD2               |     |
| 35_A1D             |                  |             |           |           |             |                  | OD1                        | Turn                           | ONL, NES, C-term              |                  | N-term, ARM            | OD2 |

|         |     |      |          |                  |                      |                                        |                  |
|---------|-----|------|----------|------------------|----------------------|----------------------------------------|------------------|
| 42_BF1  |     |      |          |                  | OD2                  | N-term,<br>Turn, ONL,<br>C-term        | OD1, ARM,<br>NES |
| 63_02A6 |     |      | OD2, ONL | N-term, OD1, NES | Turn, C-term         | ARM                                    |                  |
| 71_BF1  | OD2 |      | OD1, ONL | Turn, C-term     | N-term               | ARM, NES                               |                  |
| 85_BC   |     |      |          | OD1,OD2          | N-term, Turn,<br>ARM | ONL, NES,<br>C-term                    |                  |
| 91_cpx  |     |      |          | OD2              | OD1, ONL             | N-term,<br>Turn,<br>ARM,NES,<br>C-term |                  |
| 103_01B |     | Turn | OD2, ONL | OD1              | C-term               | ARM, NES                               | N-term           |

Annotated protein domains: N-term, N-terminal region; OD, Oligomerization domain; ARM, Arginine-Rich Motif; NES, Nuclear Export Signal; C-term, C-terminal region; ONL, OD-NES Linker.
