# Supplementary material for: Rev Protein Diversity in HIV-1 Group M Clades
Source: MDPI journal article supplement (doi:10.3390/v16050759), 2024-05-10
Supplement: s1 [file s1]

**Supplementary Table S2.** The number of nearly full-genome HIV sequence from the Los Alamos HIV database for a rev gene analyzed in the present study (data available as of September 15, 2023).

| HIV-1 form     |         | No. sequences <sup>a</sup> | HIV-1 form | No. sequences | HIV-1 form | No. sequences |
|----------------|---------|----------------------------|------------|---------------|------------|---------------|
| Sub(-sub)types | A1      | 251/245                    | 33_01B     | 7/7           | 84_A1D     | 3/3           |
|                | A2      | 4/4                        | 34_01B     | 3/3           | 85_BC      | 11/11         |
|                | A3      | 3/3                        | 35_AD      | 22/22         | 87_cpx     | 3/3           |
|                | A4      | 3/3                        | 36_cpx     | 3/3           | 88_BC      | 3/3           |
|                | A6      | 221/187                    | 37_cpx     | 4/4           | 89_BF      | 9/9           |
|                | A7      | 3/3                        | 38_BF      | 5/5           | 90_BF1     | 6/6           |
|                | A8      | 2/2                        | 39_BF      | 3/3           | 91_cpx     | 10/10         |
|                | B       | 1726/1716                  | 40_BF      | 4/4           | 92_C2U     | 7/7           |
|                | C       | 876/865                    | 41_CD      | 3/3           | 93_cpx     | 3/3           |
|                | D       | 160/156                    | 42_BF      | 17/17         | 94_cpx     | 6/6           |
|                | F1      | 74/74                      | 43_02G     | 5/5           | 95_02B     | 3/3           |
|                | F2      | 14/14                      | 44_BF      | 3/3           | 96_cpx     | 3/3           |
|                | G       | 91/91                      | 45_cpx     | 5/5           | 97_01B     | 5/5           |
|                | H       | 10/10                      | 46_BF      | 8/8           | 98_06B     | 1/1           |
|                | J       | 7/7                        | 47_BF      | 3/3           | 99_BF      | 2/2           |
|                | K       | 2/2                        | 48_01B     | 3/3           | 100_01C    | 3/3           |
| CRFs           | 01_AE   | 627/613                    | 49_cpx     | 4/4           | 101_01B    | 3/3           |
|                | 02_AG   | 205/204                    | 50_A1D     | 5/5           | 102_0107   | 2/2           |
|                | 03_AB   | 4/4                        | 51_01B     | 7/7           | 103_01B    | 10/10         |
|                | 04_cpx  | 5/5                        | 52_01B     | 3/3           | 104_0107   | 3/3           |
|                | 05_DF   | 4/4                        | 53_01B     | 4/4           | 105_0108   | 5/5           |
|                | 06_cpx  | 23/17                      | 54_01B     | 3/3           | 106_cpx    | 6/6           |
|                | 07_BC   | 40/40                      | 55_01B     | 9/9           | 107_01B    | 4/4           |
|                | 08_BC   | 33/33                      | 56_cpx     | 7/7           | 108_BC     | 5/5           |
|                | 09_cpx  | 5/5                        | 57_BC      | 7/7           | 109_0107   | 2/2           |
|                | 10_CD   | 3/3                        | 58_01B     | 6/6           | 110_BC     | 3/3           |
|                | 11_cpx  | 24/23                      | 59_01B     | 8/8           | 111_01C    | 8/8           |
|                | 12_BF   | 14/14                      | 60_BC      | 5/5           | 112_0107   | 4/4           |
|                | 13_cpx  | 10/10                      | 61_BC      | 3/3           | 113_01B    | 3/3           |
|                | 14_BG   | 12/12                      | 62_BC      | 3/3           | 114_01B    | 7/7           |
|                | 15_01B  | 8/8                        | 63_02A     | 26/26         | 115_01C    | 2/2           |
|                | 16_A2D  | 4/4                        | 64_BC      | 8/8           | 117_0107   | 3/3           |
|                | 17_BF   | 7/6                        | 65_cpx     | 6/5           | 118_BC     | 1/1           |
|                | 18_cpx  | 7/7                        | 66_BF1     | 8/8           | 119_0107   | 7/7           |
|                | 19_cpx  | 5/5                        | 67_01B     | 2/2           | 120_0107   | 3/3           |
|                | 20_BG   | 5/5                        | 68_01B     | 4/4           | 121_0107   | 4/4           |
|                | 21_A2D  | 3/3                        | 69_01B     | 7/7           | 122_BF1    | 4/4           |
|                | 22_01A1 | 15/15                      | 70_BF1     | 3/3           | 123_0107   | 3/3           |
|                | 23_BG   | 2/2                        | 71_BF1     | 14/14         | 124_cpx    | 2/2           |
|                | 24_BG   | 4/4                        | 72_BF1     | 6/6           | 125_0107   | 4/4           |
|                | 25_cpx  | 6/6                        | 73_BG      | 2/2           | 126_0755   | 4/4           |
|                | 26_A5U  | 4/4                        | 74_01B     | 3/3           | 129_56G    | 7/7           |
|                | 27_cpx  | 4/3                        | 75_BF1     | 3/3           | 130_A1B    | 1/1           |
|                | 28_BF   | 5/5                        | 76_01B     | 2/2           | 132_94B    | 5/5           |
|                | 29_BF   | 6/6                        | 77_cpx     | 4/4           | 133_A6B    | 8/8           |
|                | 30_0206 | 3/3                        | 79_0107    | 4/4           | 134_0107   | 6/6           |
|                | 31_BC   | 3/3                        | 80_0107    | 2/2           | 137_0107   | 9/9           |
|                | 32_06A6 | 3/3                        | 81_cpx     | 2/2           | 140_0107   | 5/5           |
|                |         |                            |            |               | 143_cpx    | 3/3           |

<sup>a</sup> Number sequences used in consensus calculation/ number nearly full-length HIV-1 genomes (See «Material and Methods»).  
HIV-1 subtypes/CRFs with more than available 10 sequences marked in red. CRF, circulating recombinant forms.
