# Supplementary material for: Rev Protein Diversity in HIV-1 Group M Clades
Source: MDPI journal article supplement (doi:10.3390/v16050759), 2024-05-10
Supplement: s1 [file s1]

**Supplementary Table S4.** Natural variations and average amino acid diversity at Rev individual domain within individual HIV-1 group M clades.

| HIV- clade                                                                      | Rev domain <sup>a</sup> |             |             |             |             |             |            |             |
|---------------------------------------------------------------------------------|-------------------------|-------------|-------------|-------------|-------------|-------------|------------|-------------|
|                                                                                 | N-term                  | OD1         | Turn        | ARM         | OD2         | ONL         | NES        | C-term      |
| Mean changes per sequence (variable positions, %)                               |                         |             |             |             |             |             |            |             |
| A1                                                                              | 1.1 (83.3)              | 1.5 (78.6)  | 1.3 (66.7)  | 0.6 (80.0)  | 0.8 (100.0) | 1.9 (100.0) | 0.7 (75.0) | 7.0 (100.0) |
| A6                                                                              | 0.8 (41.7)              | 1.0 (78.6)  | 0.6 (77.8)  | 1.2 (88.7)  | 1.1 (90.0)  | 1.7 (80.0)  | 0.3 (75.0) | 2.8 (95.0)  |
| B                                                                               | 0.8 (100.0)             | 2.0 (100.0) | 1.1 (100.0) | 0.5 (100.0) | 2.8 (100.0) | 2.8 (100.0) | 0.3 (75.0) | 4.6 (100.0) |
| C                                                                               | 0.7 (91.7)              | 0.9 (100.0) | 0.8 (88.9)  | 0.7 (100.0) | 1.0 (100.0) | 2.3 (100.0) | 0.6 (87.5) | 3.9 (100.0) |
| D                                                                               | 0.9 (75.0)              | 1.7 (78.6)  | 0.6 (66.7)  | 0.2 (53.3)  | 0.9 (90.0)  | 0.9 (66.7)  | 0.6 (87.5) | 4.1 (100.0) |
| F1                                                                              | 1.4 (50.0)              | 1.6 (71.4)  | 0.4 (55.5)  | 0.2 (40.0)  | 1.2 (80.0)  | 1.8 (80.0)  | 0.9 (62.5) | 5.2 (90.9)  |
| F2                                                                              | 0.5 (25.0)              | 0.6 (42.8)  | 0.6 (44.4)  | 0.4 (20.0)  | 0.8 (40.0)  | 2.4 (60.0)  | 0.3 (50.0) | 5.9 (69.7)  |
| G                                                                               | 1.1 (50.0)              | 1.6 (85.7)  | 0.7 (55.5)  | 0.6 (66.7)  | 1.1 (90.0)  | 2.6 (66.7)  | 0.9 (62.5) | 6.8 (90.0)  |
| H                                                                               | 1.8 (33.0)              | 2.2 (57.1)  | 1.0 (44.4)  | 0.5 (26.7)  | 1.5 (50.0)  | 2.4 (60.0)  | 0.2 (25.0) | 3.9 (55.4)  |
| 01_AE                                                                           | 0.3 (100.0)             | 0.3 (100.0) | 0.3 (100.0) | 0.3 (100.0) | 1.3 (90.0)  | 2.0 (93.3)  | 0.7 (87.5) | 4.9 (97.5)  |
| 02_AG                                                                           | 0.9 (83.3)              | 1.5 (85.7)  | 0.8 (88.9)  | 0.6 (73.3)  | 1.5 (90.0)  | 2.1 (93.3)  | 0.9 (62.5) | 7.0 (95.0)  |
| 06_cpx                                                                          | 0.9 (41.7)              | 1.0 (60.0)  | 1.3 (55.5)  | 0.6 (33.3)  | 0.8 (60.0)  | 1.9 (60.0)  | 0.7 (25.0) | 2.7 (45.4)  |
| 07_BC                                                                           | 1.6 (58.3)              | 1.1 (50.0)  | 0.4 (55.5)  | 0.4 (33.3)  | 0.8 (70.0)  | 1.5 (53.3)  | 0.8 (50.0) | 1.6 (75.0)  |
| 08_BC                                                                           | 0.2 (16.7)              | 0.4 (50.0)  | 0.6 (55.5)  | 1.3 (26.7)  | 0.5 (70.0)  | 0.9 (53.3)  | 0.2 (37.5) | 1.4 (70.8)  |
| 11_cpx                                                                          | 0.8 (33.3)              | 2.1 (92.8)  | 1.9 (55.5)  | 0.9 (40.0)  | 0.8 (70.0)  | 2.1 (60.0)  | 0.7 (62.5) | 4.6 (78.8)  |
| 12_BF                                                                           | 1.3 (33.3)              | 1.8 (42.8)  | 0.7 (33.3)  | 0.3 (26.7)  | 1.3 (50.0)  | 1.7 (53.3)  | 0.1 (25.0) | 3.1 (45.4)  |
| 13_cpx                                                                          | 0.8 (25.0)              | 2.0 (50.0)  | 1.0 (33.3)  | 0.6 (13.3)  | 1.5 (60.0)  | 1.4 (40.0)  | 0.7 (37.5) | 5.4 (47.5)  |
| 14_BG                                                                           | 0.4 (25.0)              | 0.9 (50.0)  | 0.2 (22.2)  | 0.5 (20.0)  | 0.6 (30.0)  | 1.4 (53.3)  | 0.1 (12.5) | 1.6 (22.5)  |
| 22_01A1                                                                         | 1.1 (33.3)              | 1.7 (50.0)  | 1.5 (55.5)  | 0.7 (13.3)  | 0.5 (50.0)  | 2.7 (66.7)  | 0.9 (62.5) | 3.7 (57.5)  |
| 35_A1D                                                                          | 0.4 (33.3)              | 1.5 (57.1)  | 0.9 (44.4)  | 0.6 (26.7)  | 0.1 (20.0)  | 1.3 (66.7)  | 0.5 (62.5) | 2.8 (40.0)  |
| 42_BF1                                                                          | 0.3 (16.7)              | 0 (0)       | 0.1 (11.1)  | 0 (0)       | 0.3 (20.0)  | 0.2 (13.3)  | 0 (0)      | 0.3 (9.1)   |
| 63_02A6                                                                         | 0.7 (33.3)              | 1.0 (50.0)  | 0.2 (55.5)  | 0.2 (22.7)  | 1.2 (70.0)  | 1.3 (53.3)  | 0.8 (25.0) | 2.1 (52.5)  |
| 71_BF1                                                                          | 0.7 (33.3)              | 2.0 (50.0)  | 0.9 (33.3)  | 0.4 (20.0)  | 2.3 (80.0)  | 2.1 (60.0)  | 0.2 (37.5) | 3.3 (48.5)  |
| 85_BC                                                                           | 0.7 (33.3)              | 1.1 (35.7)  | 0.5 (44.4)  | 0.7 (33.3)  | 0.9 (50.0)  | 0.4 (26.7)  | 0.2 (25.0) | 0.7 (25.0)  |
| 91_cpx                                                                          | 0.3 (8.3)               | 0.7 (42.8)  | 0.2 (22.2)  | 0.4 (13.3)  | 0.8 (50.0)  | 0.8 (26.7)  | 0.1 (12.5) | 0.5 (12.1)  |
| 103_01B                                                                         | 0.1 (8.3)               | 1.3 (50.0)  | 1.4 (44.4)  | 0.5 (13.3)  | 1.4 (50.0)  | 2.4 (46.07) | 0.1 (12.5) | 2.0 (27.5)  |
| Median [IQR] average amino acid diversity (10 <sup>-2</sup> substitutions/site) |                         |             |             |             |             |             |            |             |

|         |             |             |             |             |             |             |             |             |
|---------|-------------|-------------|-------------|-------------|-------------|-------------|-------------|-------------|
| A1      | 16.9 (11.6) | 14.7 (15.7) | 28.9 (31.7) | 6.6 (13.5)  | 9.6 (11.3)  | 23.9 (18.5) | 15.9 (18.1) | 26.8 (16.3) |
| A6      | 9.1 (18.80) | 13.9 (9.7)  | 13.9 (28.4) | 13.5 (10.1) | 19.6 (16.8) | 22.7 (18.5) | 0 (15.9)    | 9.6 (8.4)   |
| B       | 8.4 (9.5)   | 25.2 (20.6) | 26.3 (18.8) | 6.8 (7.3)   | 55.0 (38.4) | 36.5 (24.8) | 0 (15.5)    | 23.6 (15.0) |
| C       | 8.4 (17.4)  | 13.9 (10.4) | 16.6 (36.8) | 6.6 (13.5)  | 19.4 (19.0) | 28.6 (25.5) | 14.6 (30.6) | 28.0 (19.3) |
| D       | 8.8 (10.1)  | 22.4 (13.5) | 12.8 (15.7) | 0 (0)       | 11.9 (14.3) | 7.8 (11.0)  | 15.6 (16.5) | 20.6 (12.4) |
| F1      | 16.7 (8.3)  | 14.3 (7.1)  | 0 (11.1)    | 0 (6.7)     | 20.0 (20.0) | 20.0 (13.3) | 12.5 (25.0) | 24.2 (12.1) |
| F2      | 8.3 (8.3)   | 7.1 (14.3)  | 11.1 (11.1) | 6.7 (6.7)   | 10.0 (10.0) | 26.7 (13.3) | 12.5 (12.5) | 27.3 (9.1)  |
| G       | 16.7 (8.3)  | 15.4 (7.1)  | 11.1 (22.2) | 6.7 (6.7)   | 20.0 (20.0) | 26.7 (13.3) | 12.5 (12.5) | 23.1 (9.3)  |
| H       | 25.0 (8.3)  | 21.4 (14.3) | 22.2 (22.2) | 6.7 (0)     | 20.0 (10.0) | 26.7 (13.3) | 0 (12.5)    | 19.5 (9.1)  |
| 01_AE   | 0 (8.3)     | 14.0 (15.0) | 25.1 (20.9) | 6.7 (6.9)   | 20.3 (23.5) | 24.8 (20.6) | 15.9 (16.6) | 16.7 (10.5) |
| 02_AG   | 10.4 (11.1) | 15.2 (15.9) | 15.0 (18.9) | 6.6 (13.5)  | 21.8 (24.8) | 25.6 (22.9) | 15.7 (18.5) | 25.0 (13.6) |
| 06_cpx  | 14.6 (10.9) | 9.6 (23.2)  | 29.2 (30.3) | 6.6 (13.6)  | 9.6 (23.2)  | 25.1 (21.0) | 15.3 (34.3) | 16.2 (10.9) |
| 07_BC   | 18.7 (20.0) | 14.1 (14.8) | 13.4 (13.8) | 6.6 (7.7)   | 11.0 (19.9) | 15.7 (17.0) | 14.6 (35.6) | 12.7 (9.3)  |
| 08_BC   | 0 (8.6)     | 0 (6.9)     | 13.5 (28.3) | 13.5 (11.2) | 9.1 (19.3)  | 15.3 (10.2) | 0 (15.9)    | 8.7 (11.3)  |
| 11_cpx  | 8.5 (8.9)   | 22.9 (23.3) | 44.3 (28.5) | 13.3 (7.8)  | 9.5 (21.0)  | 27.2 (17.1) | 17.0 (36.6) | 23.8 (15.0) |
| 12_BF   | 18.2 (13.8) | 22.7 (9.9)  | 14.0 (13.5) | 6.6 (6.7)   | 20.1 (22.7) | 27.9 (18.2) | 0 (0)       | 17.1 (12.8) |
| 13_cpx  | 8.9 (9.9)   | 23.4 (12.2) | 27.5 (16.6) | 6.6 (6.8)   | 19.9 (23.2) | 17.7 (18.6) | 15.9 (18.8) | 19.9 (10.2) |
| 14_BG   | 8.1 (9.7)   | 7.2 (9.3)   | 0 (13.5)    | 6.6 (6.7)   | 8.9 (19.2)  | 14.0 (15.5) | 0 (0)       | 7.4 (3.4)   |
| 22_01A1 | 9.3 (10.4)  | 18.4 (15.8) | 45.1 (23.8) | 6.7 (1.2)   | 9.6 (19.8)  | 37.4 (25.1) | 33.4 (23.1) | 17.1 (8.9)  |
| 35_A1D  | 0 (9.6)     | 15.1 (17.6) | 13.8 (15.6) | 6.5 (6.5)   | 0 (8.8)     | 15.8 (18.4) | 15.8 (32.1) | 10.4 (5.6)  |
| 42_BF1  | 8.1 (8.2)   | 0 (0)       | 0 (0)       | 0 (0)       | 0 (11.2)    | 0 (7.6)     | 0 (0)       | 0 (3.1)     |
| 63_02A6 | 8.9 (20.0)  | 8.0 (21.9)  | 0 (13.5)    | 0 (0)       | 21.0 (25.0) | 15.8 (20.0) | 13.6 (28.9) | 7.4 (10.5)  |
| 71_BF1  | 8.4 (10.2)  | 25.5 (16.6) | 25.7 (17.7) | 6.7 (6.8)   | 46.2 (28.3) | 25.7 (20.8) | 0 (15.5)    | 17.7 (9.4)  |
| 85_BC   | 8.2 (18.3)  | 14.0 (14.0) | 13.4 (13.7) | 6.8 (13.8)  | 18.8 (30.0) | 0 (15.9)    | 0 (14.4)    | 4.1 (4.3)   |
| 91_cpx  | 0 (8.8)     | 7.4 (8.4)   | 0 (0)       | 6.6 (6.6)   | 9.5 (11.0)  | 8.2 (9.0)   | 0 (0)       | 3.3 (3.5)   |
| 103_01B | 0 (0)       | 14.8 (7.7)  | 28.6 (24.4) | 6.6 (6.7)   | 21.3 (21.2) | 34.2 (23.1) | 0 (0)       | 8.1 (8.6)   |

<sup>a</sup> Annotated protein domains are indicated as colored rectangles: N-term, N-terminal region; OD, Oligomerization domain; ARM, Arginine-Rich Motif; NES, Nuclear Export Signal; C-term, C-terminal region; ONL, OD-NES Linker. IQR, interquartile range (25% - 75%, Q1-Q3).
