# Supplementary material for: Rev Protein Diversity in HIV-1 Group M Clades
Source: Viruses. 2024 May 10;16(5):759. doi: 10.3390/v16050759 (PMC11125641; doi:10.3390/v16050759)
Supplement: Supplementary file 1 [file viruses-16-00759-s001.zip]

Archive with 7 entries (7 files):
- Figure S1_Revised.pdf
- Table S1_Revised.xlsx
- Table S2_Revised.pdf
- Table S3_Revised.xlsx
- Table S4_Revised.pdf
- Table S5_Revised.xlsx
- Table S6_Revised.pdf
