# Supplementary material for: Rev Protein Diversity in HIV-1 Group M Clades
Source: Viruses. 2024 May 10;16(5):759. doi: 10.3390/v16050759 (PMC11125641; doi:10.3390/v16050759)
Supplement: Supplementary file 1 [file viruses-16-00759-s001.zip › Table S1_Revised.xlsx]

## Sheet: Лист1
	Supplementary Table S1. GenBank Accession numbers, origin information and sampling date for the HIV-1 sequences used in this study.
	#	GenBank Acc. No.	Subtype	Country	Date
	1	GQ477441	01_AE	AF	2007
	2	OP701429	01_AE	AU	2018
	3	MN486023	01_AE	BE	2017
	4	MN486035	01_AE	BE	2017
	5	MH746262	01_AE	BG	2008
	6	MH746252	01_AE	BG	2009
	7	AF197340	01_AE	CF	1990
	8	AF197341	01_AE	CF	1990
	9	U51188	01_AE	CF	1990
	10	MN116207	01_AE	CM	2003
	11	MN116208	01_AE	CM	2003
	12	MN116209	01_AE	CM	2005
	13	MN116212	01_AE	CM	2006
	14	KP718930	01_AE	CM	2011
	15	MT624753	01_AE	CN	-
	16	AY008718	01_AE	CN	1997
	17	AY008714	01_AE	CN	1997
	18	JX112860	01_AE	CN	2002
	19	JX112861	01_AE	CN	2002
	20	JX112862	01_AE	CN	2002
	21	JX112863	01_AE	CN	2002
	22	JX112864	01_AE	CN	2002
	23	JX112865	01_AE	CN	2002
	24	JX112866	01_AE	CN	2002
	25	GU564221	01_AE	CN	2005
	26	GU564222	01_AE	CN	2005
	27	GU564223	01_AE	CN	2005
	28	GU564224	01_AE	CN	2005
	29	GU564225	01_AE	CN	2005
	30	GQ845124	01_AE	CN	2005
	31	GQ845125	01_AE	CN	2005
	32	GQ845126	01_AE	CN	2005
	33	GU564227	01_AE	CN	2005
	34	GU564228	01_AE	CN	2005
	35	GU564229	01_AE	CN	2005
	36	MW079292	01_AE	CN	2005
	37	MW079293	01_AE	CN	2005
	38	MW079294	01_AE	CN	2005
	39	MW079295	01_AE	CN	2005
	40	MW079296	01_AE	CN	2005
	41	MW079297	01_AE	CN	2005
	42	MW079298	01_AE	CN	2005
	43	MW079300	01_AE	CN	2005
	44	MW079301	01_AE	CN	2005
	45	MW079302	01_AE	CN	2005
	46	MW079303	01_AE	CN	2005
	47	MW079304	01_AE	CN	2005
	48	DQ859178	01_AE	CN	2005
	49	EF036528	01_AE	CN	2005
	50	DQ859179	01_AE	CN	2005
	51	EF036527	01_AE	CN	2005
	52	EF036529	01_AE	CN	2005
	53	EF036530	01_AE	CN	2005
	54	EF036534	01_AE	CN	2005
	55	EF036535	01_AE	CN	2005
	56	KP178420	01_AE	CN	2005
	57	GU564230	01_AE	CN	2006
	58	MW079305	01_AE	CN	2006
	59	MW079306	01_AE	CN	2006
	60	DQ859180	01_AE	CN	2006
	61	EF036536	01_AE	CN	2006
	62	EF036531	01_AE	CN	2006
	63	EF036532	01_AE	CN	2006
	64	EF036533	01_AE	CN	2006
	65	JX112857	01_AE	CN	2006
	66	JX112858	01_AE	CN	2006
	67	KF835499	01_AE	CN	2007
	68	KF835502	01_AE	CN	2007
	69	KF835503	01_AE	CN	2007
	70	KF835504	01_AE	CN	2007
	71	KF835505	01_AE	CN	2007
	72	KF835513	01_AE	CN	2007
	73	KF835514	01_AE	CN	2007
	74	KF835516	01_AE	CN	2007
	75	KF835518	01_AE	CN	2007
	76	KF835519	01_AE	CN	2007
	77	KF835523	01_AE	CN	2007
	78	KF835527	01_AE	CN	2007
	79	KF835528	01_AE	CN	2007
	80	KF835533	01_AE	CN	2007
	81	KF835536	01_AE	CN	2007
	82	KF835538	01_AE	CN	2007
	83	KF835542	01_AE	CN	2007
	84	KF835543	01_AE	CN	2007
	85	FJ441290	01_AE	CN	2007
	86	JX112809	01_AE	CN	2007
	87	JX112810	01_AE	CN	2007
	88	JX112811	01_AE	CN	2007
	89	JX112813	01_AE	CN	2007
	90	JX112814	01_AE	CN	2007
	91	JX112815	01_AE	CN	2007
	92	JX112816	01_AE	CN	2007
	93	JX112817	01_AE	CN	2007
	94	JX112818	01_AE	CN	2007
	95	JX112820	01_AE	CN	2007
	96	JX112821	01_AE	CN	2007
	97	JX112822	01_AE	CN	2007
	98	JX112823	01_AE	CN	2007
	99	JX112824	01_AE	CN	2007
	100	JX112825	01_AE	CN	2007
	101	JX112826	01_AE	CN	2007
	102	JX112827	01_AE	CN	2007
	103	JX112828	01_AE	CN	2007
	104	JX112829	01_AE	CN	2007
	105	JX112830	01_AE	CN	2007
	106	JX112831	01_AE	CN	2007
	107	JX112832	01_AE	CN	2007
	108	JX112833	01_AE	CN	2007
	109	JX112834	01_AE	CN	2007
	110	JX112835	01_AE	CN	2007
	111	JX112836	01_AE	CN	2007
	112	JX112837	01_AE	CN	2007
	113	JX112838	01_AE	CN	2007
	114	JX112839	01_AE	CN	2007
	115	JX112840	01_AE	CN	2007
	116	JX112841	01_AE	CN	2007
	117	JX112842	01_AE	CN	2007
	118	JX112843	01_AE	CN	2007
	119	JX112844	01_AE	CN	2007
	120	JX112845	01_AE	CN	2007
	121	JX112850	01_AE	CN	2007
	122	JX112851	01_AE	CN	2007
	123	JX112852	01_AE	CN	2007
	124	JX112853	01_AE	CN	2007
	125	JX112854	01_AE	CN	2007
	126	JX112855	01_AE	CN	2007
	127	JX112856	01_AE	CN	2007
	128	JX112859	01_AE	CN	2007
	129	JX960612	01_AE	CN	2008
	130	JX960606	01_AE	CN	2008
	131	JX960617	01_AE	CN	2008
	132	JX960630	01_AE	CN	2009
	133	JX960627	01_AE	CN	2009
	134	JX960604	01_AE	CN	2009
	135	JX960605	01_AE	CN	2009
	136	JX960623	01_AE	CN	2009
	137	JX960613	01_AE	CN	2009
	138	JX960634	01_AE	CN	2009
	139	JX960615	01_AE	CN	2009
	140	JX960618	01_AE	CN	2009
	141	JX960631	01_AE	CN	2009
	142	JX960614	01_AE	CN	2009
	143	JX960607	01_AE	CN	2009
	144	JX960628	01_AE	CN	2009
	145	JX960603	01_AE	CN	2009
	146	JX960621	01_AE	CN	2009
	147	JX960625	01_AE	CN	2009
	148	JX960629	01_AE	CN	2009
	149	JX960626	01_AE	CN	2009
	150	HQ215555	01_AE	CN	2009
	151	HQ215553	01_AE	CN	2009
	152	KP109504	01_AE	CN	2009
	153	KP109505	01_AE	CN	2009
	154	JX112867	01_AE	CN	2009
	155	JX112868	01_AE	CN	2009
	156	JX112869	01_AE	CN	2009
	157	JX112870	01_AE	CN	2009
	158	JX960633	01_AE	CN	2010
	159	JX960608	01_AE	CN	2010
	160	JX960609	01_AE	CN	2010
	161	JX960622	01_AE	CN	2010
	162	JX960619	01_AE	CN	2010
	163	JX960611	01_AE	CN	2010
	164	JX960624	01_AE	CN	2010
	165	JX960610	01_AE	CN	2010
	166	JX960616	01_AE	CN	2010
	167	JX960620	01_AE	CN	2010
	168	JX960632	01_AE	CN	2010
	169	JX112796	01_AE	CN	2010
	170	JX112797	01_AE	CN	2010
	171	JX112798	01_AE	CN	2010
	172	JX112799	01_AE	CN	2010
	173	JX112800	01_AE	CN	2010
	174	JX112801	01_AE	CN	2010
	175	JX112802	01_AE	CN	2010
	176	JX112803	01_AE	CN	2010
	177	JX112804	01_AE	CN	2010
	178	JX112805	01_AE	CN	2010
	179	JX112806	01_AE	CN	2010
	180	JX112807	01_AE	CN	2010
	181	JX112808	01_AE	CN	2010
	182	KP109506	01_AE	CN	2010
	183	KP109507	01_AE	CN	2010
	184	JX112846	01_AE	CN	2010
	185	JX112847	01_AE	CN	2010
	186	JX112848	01_AE	CN	2010
	187	JX112849	01_AE	CN	2010
	188	KC870029	01_AE	CN	2010
	189	KC870039	01_AE	CN	2010
	190	KC870041	01_AE	CN	2010
	191	KC596064	01_AE	CN	2011
	192	KC596065	01_AE	CN	2011
	193	KP109508	01_AE	CN	2012
	194	MT624757	01_AE	CN	2016
	195	MT624756	01_AE	CN	2016
	196	MT347590	01_AE	CN	2017
	197	MZ359100	01_AE	CN	2018
	198	ON959789	01_AE	CN	2019
	199	KP873161	01_AE	GB	2010
	200	KP873163	01_AE	GB	2012
	201	MF109358	01_AE	GB	2013
	202	MF109471	01_AE	GB	2013
	203	MF109407	01_AE	GB	2014
	204	MF109618	01_AE	GB	2014
	205	MF109621	01_AE	GB	2014
	206	DQ234790	01_AE	HK	2004
	207	AB485652	01_AE	ID	1993
	208	OQ357236	01_AE	ID	2013
	209	OQ357251	01_AE	ID	2013
	210	OQ357239	01_AE	ID	2013
	211	OQ357238	01_AE	ID	2013
	212	OQ357240	01_AE	ID	2014
	213	OQ357246	01_AE	ID	2014
	214	OQ357235	01_AE	ID	2014
	215	OQ357234	01_AE	ID	2014
	216	OQ357249	01_AE	ID	2014
	217	OQ357248	01_AE	ID	2014
	218	OQ357243	01_AE	ID	2014
	219	OQ357237	01_AE	ID	2016
	220	OQ357247	01_AE	ID	2016
	221	OQ357241	01_AE	ID	2016
	222	OQ357245	01_AE	ID	2018
	223	AB703616	01_AE	IR	2010
	224	AB253423	01_AE	JP	-
	225	AB253692	01_AE	JP	-
	226	AB253635	01_AE	JP	-
	227	AB253647	01_AE	JP	-
	228	AB253703	01_AE	JP	-
	229	AB253659	01_AE	JP	-
	230	AB253426	01_AE	JP	-
	231	AB565503	01_AE	JP	-
	232	AB052995	01_AE	JP	1993
	233	AB070352	01_AE	JP	1993
	234	KF859741	01_AE	JP	2011
	235	MG760382	01_AE	LA	2011
	236	MG760384	01_AE	LA	2011
	237	MG760389	01_AE	LA	2011
	238	MG760390	01_AE	LA	2011
	239	MG760391	01_AE	LA	2011
	240	MG760395	01_AE	LA	2011
	241	MG760396	01_AE	LA	2011
	242	MG760397	01_AE	LA	2011
	243	MG760398	01_AE	LA	2011
	244	MG760400	01_AE	LA	2011
	245	MG760402	01_AE	LA	2011
	246	MG760404	01_AE	LA	2011
	247	MG760405	01_AE	LA	2011
	248	MG760406	01_AE	LA	2011
	249	MG760408	01_AE	LA	2011
	250	MG760409	01_AE	LA	2011
	251	MG760410	01_AE	LA	2011
	252	MG760412	01_AE	LA	2011
	253	MG760413	01_AE	LA	2011
	254	MG760414	01_AE	LA	2011
	255	MG760415	01_AE	LA	2011
	256	MG760416	01_AE	LA	2011
	257	MG760417	01_AE	LA	2011
	258	MG760419	01_AE	LA	2011
	259	MG760420	01_AE	LA	2011
	260	MG760421	01_AE	LA	2011
	261	MG760422	01_AE	LA	2011
	262	MG760423	01_AE	LA	2011
	263	MG760424	01_AE	LA	2011
	264	MG760425	01_AE	LA	2011
	265	MG760426	01_AE	LA	2011
	266	MG760428	01_AE	LA	2011
	267	MG760429	01_AE	LA	2011
	268	MG760371	01_AE	LA	2012
	269	MG760372	01_AE	LA	2012
	270	MG760373	01_AE	LA	2012
	271	MG760374	01_AE	LA	2012
	272	MG760375	01_AE	LA	2012
	273	MG760376	01_AE	LA	2012
	274	MG760377	01_AE	LA	2012
	275	MG760378	01_AE	LA	2012
	276	MG760381	01_AE	LA	2012
	277	MG760383	01_AE	LA	2012
	278	MG760387	01_AE	LA	2012
	279	MG760388	01_AE	LA	2012
	280	MG760393	01_AE	LA	2012
	281	MG760401	01_AE	LA	2012
	282	MG760430	01_AE	LA	2012
	283	MG760431	01_AE	LA	2012
	284	MH327750	01_AE	PH	2015
	285	MH078560	01_AE	PH	2015
	286	MH078561	01_AE	PH	2015
	287	KY658688	01_AE	PH	2015
	288	MH327752	01_AE	PH	2016
	289	MH327759	01_AE	PH	2016
	290	MH327760	01_AE	PH	2016
	291	MH327762	01_AE	PH	2016
	292	MH327764	01_AE	PH	2016
	293	MH327766	01_AE	PH	2016
	294	MH078562	01_AE	PH	2016
	295	MH327756	01_AE	PH	2017
	296	MH327761	01_AE	PH	2017
	297	MH327763	01_AE	PH	2017
	298	MF373160	01_AE	SE	2011
	299	KP411840	01_AE	SE	2011
	300	KP411841	01_AE	SE	2011
	301	KP411842	01_AE	SE	2011
	302	MF373172	01_AE	SE	2012
	303	MF373173	01_AE	SE	2012
	304	MN736703	01_AE	SI	2012
	305	MK867564	01_AE	TH	-
	306	ON500971	01_AE	TH	-
	307	ON501004	01_AE	TH	-
	308	ON500878	01_AE	TH	-
	309	ON500898	01_AE	TH	-
	310	ON500912	01_AE	TH	-
	311	ON500926	01_AE	TH	-
	312	ON500946	01_AE	TH	-
	313	AB485654	01_AE	TH	-
	314	AY713425	01_AE	TH	1990
	315	AF259954	01_AE	TH	1990
	316	U54771	01_AE	TH	1990
	317	AB220944	01_AE	TH	1993
	318	AB220945	01_AE	TH	1993
	319	AB253424	01_AE	TH	1993
	320	AB220946	01_AE	TH	1993
	321	AB220947	01_AE	TH	1993
	322	AB220948	01_AE	TH	1993
	323	U51189	01_AE	TH	1993
	324	AF164485	01_AE	TH	1993
	325	AB032740	01_AE	TH	1995
	326	AB032741	01_AE	TH	1995
	327	AY713424	01_AE	TH	1996
	328	AY713421	01_AE	TH	1996
	329	DQ354117	01_AE	TH	1996
	330	AY713420	01_AE	TH	1997
	331	AY713419	01_AE	TH	1997
	332	AY125894	01_AE	TH	1997
	333	AY713422	01_AE	TH	1998
	334	AY945728	01_AE	TH	1998
	335	AY945712	01_AE	TH	1999
	336	AY945718	01_AE	TH	1999
	337	AY945726	01_AE	TH	1999
	338	AY713423	01_AE	TH	1999
	339	AY945727	01_AE	TH	1999
	340	AY945731	01_AE	TH	1999
	341	AY945732	01_AE	TH	1999
	342	AY358065	01_AE	TH	1999
	343	AY358043	01_AE	TH	1999
	344	AY358044	01_AE	TH	1999
	345	AY358045	01_AE	TH	1999
	346	AY358039	01_AE	TH	1999
	347	AY358047	01_AE	TH	1999
	348	AY358048	01_AE	TH	1999
	349	AY358049	01_AE	TH	1999
	350	AY358051	01_AE	TH	1999
	351	AY945716	01_AE	TH	2000
	352	AY945717	01_AE	TH	2000
	353	AY945721	01_AE	TH	2000
	354	AY945722	01_AE	TH	2000
	355	AY945724	01_AE	TH	2000
	356	AY945725	01_AE	TH	2000
	357	DQ789392	01_AE	TH	2000
	358	AY358066	01_AE	TH	2000
	359	AY358046	01_AE	TH	2000
	360	AY358052	01_AE	TH	2000
	361	AY358057	01_AE	TH	2000
	362	AY358067	01_AE	TH	2000
	363	AY358060	01_AE	TH	2000
	364	AY358061	01_AE	TH	2000
	365	AY358063	01_AE	TH	2000
	366	AY945713	01_AE	TH	2001
	367	AY945719	01_AE	TH	2001
	368	AY945720	01_AE	TH	2001
	369	AY945730	01_AE	TH	2001
	370	KU168264	01_AE	TH	2001
	371	AY358050	01_AE	TH	2001
	372	AY358040	01_AE	TH	2001
	373	AY358041	01_AE	TH	2001
	374	AY358056	01_AE	TH	2001
	375	AY358038	01_AE	TH	2001
	376	AY358059	01_AE	TH	2001
	377	AY358036	01_AE	TH	2001
	378	AY358068	01_AE	TH	2001
	379	AY358064	01_AE	TH	2001
	380	AY358037	01_AE	TH	2002
	381	AY358062	01_AE	TH	2002
	382	KU168309	01_AE	TH	2003
	383	JN248318	01_AE	TH	2004
	384	JN248324	01_AE	TH	2004
	385	JN248327	01_AE	TH	2004
	386	JN248328	01_AE	TH	2004
	387	JN248330	01_AE	TH	2004
	388	JN248334	01_AE	TH	2004
	389	JN248336	01_AE	TH	2004
	390	JX447018	01_AE	TH	2004
	391	JX447535	01_AE	TH	2004
	392	DQ314731	01_AE	TH	2004
	393	DQ314732	01_AE	TH	2004
	394	JN248338	01_AE	TH	2005
	395	JN248339	01_AE	TH	2005
	396	JN248341	01_AE	TH	2005
	397	JN248342	01_AE	TH	2005
	398	JN248355	01_AE	TH	2005
	399	JN248356	01_AE	TH	2005
	400	JX446710	01_AE	TH	2005
	401	JX447077	01_AE	TH	2005
	402	JX447268	01_AE	TH	2005
	403	JX447413	01_AE	TH	2005
	404	JX447589	01_AE	TH	2005
	405	JX447618	01_AE	TH	2005
	406	JX447936	01_AE	TH	2005
	407	JX448019	01_AE	TH	2005
	408	JX446666	01_AE	TH	2006
	409	JX446736	01_AE	TH	2006
	410	JX446853	01_AE	TH	2006
	411	JX446899	01_AE	TH	2006
	412	JX447087	01_AE	TH	2006
	413	JX447132	01_AE	TH	2006
	414	JX447312	01_AE	TH	2006
	415	JX447315	01_AE	TH	2006
	416	JX447349	01_AE	TH	2006
	417	JX447403	01_AE	TH	2006
	418	JX447465	01_AE	TH	2006
	419	JX447638	01_AE	TH	2006
	420	JX447678	01_AE	TH	2006
	421	JX447709	01_AE	TH	2006
	422	JX447884	01_AE	TH	2006
	423	JX446877	01_AE	TH	2007
	424	JX446916	01_AE	TH	2007
	425	JX446987	01_AE	TH	2007
	426	JX447028	01_AE	TH	2007
	427	JX447054	01_AE	TH	2007
	428	JX447063	01_AE	TH	2007
	429	JX447283	01_AE	TH	2007
	430	JX447499	01_AE	TH	2007
	431	JX447721	01_AE	TH	2007
	432	JN860761	01_AE	TH	2007
	433	JN860763	01_AE	TH	2007
	434	JN860764	01_AE	TH	2007
	435	JN860766	01_AE	TH	2007
	436	JN860767	01_AE	TH	2007
	437	JX446755	01_AE	TH	2008
	438	JX446848	01_AE	TH	2008
	439	JX447072	01_AE	TH	2008
	440	JX447122	01_AE	TH	2008
	441	JX447300	01_AE	TH	2008
	442	JX447305	01_AE	TH	2008
	443	JX447359	01_AE	TH	2008
	444	JX447454	01_AE	TH	2008
	445	JX448028	01_AE	TH	2008
	446	JN860768	01_AE	TH	2008
	447	KY580541	01_AE	TH	2009
	448	JX447726	01_AE	TH	2009
	449	JX448057	01_AE	TH	2009
	450	MG989497	01_AE	TH	2010
	451	MG989499	01_AE	TH	2010
	452	MG989500	01_AE	TH	2010
	453	MG989502	01_AE	TH	2010
	454	MG989515	01_AE	TH	2010
	455	MG989517	01_AE	TH	2010
	456	MG989521	01_AE	TH	2010
	457	MG989530	01_AE	TH	2010
	458	MG989559	01_AE	TH	2010
	459	MG989562	01_AE	TH	2010
	460	MG989566	01_AE	TH	2010
	461	MG989569	01_AE	TH	2010
	462	MN792014	01_AE	TH	2010
	463	MN792055	01_AE	TH	2010
	464	KY580582	01_AE	TH	2010
	465	MN792117	01_AE	TH	2010
	466	ON959743	01_AE	TH	2010
	467	MN792281	01_AE	TH	2010
	468	MN792331	01_AE	TH	2010
	469	KY580643	01_AE	TH	2010
	470	KP109513	01_AE	TH	2010
	471	MG989495	01_AE	TH	2011
	472	MG989504	01_AE	TH	2011
	473	MG989510	01_AE	TH	2011
	474	MG989516	01_AE	TH	2011
	475	MG989525	01_AE	TH	2011
	476	MG989527	01_AE	TH	2011
	477	MG989542	01_AE	TH	2011
	478	MG989544	01_AE	TH	2011
	479	MG989561	01_AE	TH	2011
	480	MG989565	01_AE	TH	2011
	481	MW443197	01_AE	TH	2011
	482	MW443206	01_AE	TH	2011
	483	MN792241	01_AE	TH	2011
	484	MN792425	01_AE	TH	2011
	485	KY580684	01_AE	TH	2011
	486	MW443216	01_AE	TH	2011
	487	MK116905	01_AE	TH	2011
	488	MN792550	01_AE	TH	2011
	489	MG989492	01_AE	TH	2012
	490	MG989498	01_AE	TH	2012
	491	MG989509	01_AE	TH	2012
	492	MG989518	01_AE	TH	2012
	493	MG989523	01_AE	TH	2012
	494	MG989531	01_AE	TH	2012
	495	MN792470	01_AE	TH	2012
	496	ON862984	01_AE	TH	2012
	497	ON863063	01_AE	TH	2012
	498	MG989501	01_AE	TH	2013
	499	MG989508	01_AE	TH	2013
	500	MG989552	01_AE	TH	2013
	501	MG989563	01_AE	TH	2013
	502	MG989564	01_AE	TH	2013
	503	ON902087	01_AE	TH	2013
	504	ON902109	01_AE	TH	2013
	505	ON902157	01_AE	TH	2013
	506	MG989503	01_AE	TH	2014
	507	MG989511	01_AE	TH	2014
	508	MG989514	01_AE	TH	2014
	509	MG989519	01_AE	TH	2014
	510	MG989524	01_AE	TH	2014
	511	MG989529	01_AE	TH	2014
	512	MG989532	01_AE	TH	2014
	513	MG989535	01_AE	TH	2014
	514	MG989538	01_AE	TH	2014
	515	MG989548	01_AE	TH	2014
	516	MT121537	01_AE	TH	2014
	517	ON902511	01_AE	TH	2014
	518	ON902577	01_AE	TH	2014
	519	ON902662	01_AE	TH	2014
	520	ON902728	01_AE	TH	2014
	521	ON902787	01_AE	TH	2014
	522	ON902903	01_AE	TH	2014
	523	ON902962	01_AE	TH	2014
	524	MG989496	01_AE	TH	2015
	525	MG989507	01_AE	TH	2015
	526	MG989528	01_AE	TH	2015
	527	MG989534	01_AE	TH	2015
	528	MG989537	01_AE	TH	2015
	529	MG989539	01_AE	TH	2015
	530	MG989543	01_AE	TH	2015
	531	MG989546	01_AE	TH	2015
	532	MG989553	01_AE	TH	2015
	533	MG989554	01_AE	TH	2015
	534	MG989558	01_AE	TH	2015
	535	MG989568	01_AE	TH	2015
	536	ON901968	01_AE	TH	2016
	537	ON902831	01_AE	TH	2016
	538	ON902254	01_AE	TH	2016
	539	ON902403	01_AE	TH	2016
	540	ON903030	01_AE	TH	2017
	541	ON903091	01_AE	TH	2018
	542	ON863133	01_AE	TH	2018
	543	ON863256	01_AE	TH	2018
	544	AY444803	01_AE	US	1998
	545	AY444805	01_AE	US	1998
	546	AY444806	01_AE	US	1998
	547	AY444804	01_AE	US	2000
	548	JX863920	01_AE	US	2005
	549	MT635148	01_AE	VN	-
	550	MT635149	01_AE	VN	-
	551	MT635150	01_AE	VN	-
	552	MT635151	01_AE	VN	-
	553	MT635152	01_AE	VN	-
	554	MT635153	01_AE	VN	-
	555	MT635154	01_AE	VN	-
	556	MT635155	01_AE	VN	-
	557	FJ185245	01_AE	VN	1997
	558	FJ185246	01_AE	VN	1997
	559	FJ185247	01_AE	VN	1997
	560	FJ185248	01_AE	VN	1997
	561	FJ185249	01_AE	VN	1997
	562	FJ185250	01_AE	VN	1997
	563	FJ185251	01_AE	VN	1997
	564	FJ185252	01_AE	VN	1997
	565	FJ185253	01_AE	VN	1997
	566	FJ185254	01_AE	VN	1997
	567	FJ185255	01_AE	VN	1997
	568	FJ185256	01_AE	VN	1997
	569	FJ185257	01_AE	VN	1997
	570	FJ185258	01_AE	VN	1997
	571	FJ185237	01_AE	VN	1997
	572	FJ185238	01_AE	VN	1997
	573	FJ185239	01_AE	VN	1997
	574	FJ185259	01_AE	VN	1997
	575	FJ185260	01_AE	VN	1997
	576	FJ185240	01_AE	VN	1997
	577	FJ185241	01_AE	VN	1997
	578	FJ185242	01_AE	VN	1997
	579	FJ185243	01_AE	VN	1997
	580	FJ185244	01_AE	VN	1997
	581	FJ185228	01_AE	VN	1998
	582	FJ185229	01_AE	VN	1998
	583	FJ185230	01_AE	VN	1998
	584	FJ185231	01_AE	VN	1998
	585	FJ185233	01_AE	VN	1998
	586	FJ185234	01_AE	VN	1998
	587	FJ185232	01_AE	VN	1998
	588	FJ185235	01_AE	VN	1998
	589	FJ185236	01_AE	VN	1998
	590	MT635140	01_AE	VN	2005
	591	MT635143	01_AE	VN	2008
	592	MT635158	01_AE	VN	2009
	593	MT635173	01_AE	VN	2010
	594	MT635142	01_AE	VN	2011
	595	MT635174	01_AE	VN	2011
	596	MT635157	01_AE	VN	2012
	597	MT635160	01_AE	VN	2012
	598	MT635161	01_AE	VN	2012
	599	MT635162	01_AE	VN	2012
	600	MT635163	01_AE	VN	2012
	601	MT635166	01_AE	VN	2012
	602	MT635168	01_AE	VN	2012
	603	MT635164	01_AE	VN	2013
	604	MT635165	01_AE	VN	2013
	605	MT635167	01_AE	VN	2013
	606	MT635169	01_AE	VN	2013
	607	MT635170	01_AE	VN	2013
	608	MT635172	01_AE	VN	2013
	609	MT222954	01_AE	VN	2014
	610	MT222955	01_AE	VN	2014
	611	MT635175	01_AE	VN	2014
	612	MT222956	01_AE	VN	2015
	613	MT222957	01_AE	VN	2015
	614	KU168267	02_AG	-	2000
	615	KX228814	02_AG	AO	2006
	616	MN485975	02_AG	BE	2014
	617	MN485999	02_AG	BE	2016
	618	MT417738	02_AG	BE	2019
	619	MH078536	02_AG	CI	2016
	620	MH078539	02_AG	CI	2016
	621	AF377954	02_AG	CM	1997
	622	AF377955	02_AG	CM	1997
	623	AY271690	02_AG	CM	1999
	624	KU168265	02_AG	CM	2000
	625	MK086123	02_AG	CM	2000
	626	AY371122	02_AG	CM	2001
	627	AY371123	02_AG	CM	2001
	628	AY371124	02_AG	CM	2001
	629	GU201494	02_AG	CM	2001
	630	AY371131	02_AG	CM	2001
	631	GU201498	02_AG	CM	2001
	632	GU201499	02_AG	CM	2001
	633	AY371137	02_AG	CM	2001
	634	GU201495	02_AG	CM	2001
	635	AY371132	02_AG	CM	2001
	636	GU201500	02_AG	CM	2001
	637	AY371134	02_AG	CM	2001
	638	AY371136	02_AG	CM	2001
	639	AY371138	02_AG	CM	2001
	640	AY371142	02_AG	CM	2001
	641	MK086124	02_AG	CM	2001
	642	AY371125	02_AG	CM	2002
	643	AY371126	02_AG	CM	2002
	644	AY371127	02_AG	CM	2002
	645	AY371139	02_AG	CM	2002
	646	AY371140	02_AG	CM	2002
	647	AY371146	02_AG	CM	2002
	648	AY371128	02_AG	CM	2002
	649	AY371129	02_AG	CM	2002
	650	GU201512	02_AG	CM	2002
	651	AY371130	02_AG	CM	2002
	652	GU201513	02_AG	CM	2002
	653	GU201514	02_AG	CM	2002
	654	AY371141	02_AG	CM	2002
	655	KU168304	02_AG	CM	2003
	656	MH705136	02_AG	CM	2004
	657	MN153477	02_AG	CM	2006
	658	MN153479	02_AG	CM	2006
	659	MN153480	02_AG	CM	2006
	660	MT349419	02_AG	CM	2006
	661	KU168310	02_AG	CM	2007
	662	MN153486	02_AG	CM	2008
	663	MN153494	02_AG	CM	2008
	664	MN153495	02_AG	CM	2008
	665	MN153478	02_AG	CM	2008
	666	JX140646	02_AG	CM	2008
	667	JX140647	02_AG	CM	2008
	668	KX228823	02_AG	CM	2008
	669	MT349409	02_AG	CM	2010
	670	MT349411	02_AG	CM	2010
	671	MT349412	02_AG	CM	2010
	672	MT349408	02_AG	CM	2010
	673	MT349414	02_AG	CM	2010
	674	KF859739	02_AG	CM	2010
	675	KU749419	02_AG	CM	2010
	676	MK086132	02_AG	CM	2010
	677	MK086109	02_AG	CM	2010
	678	MT349415	02_AG	CM	2011
	679	MK086125	02_AG	CM	2011
	680	MT222937	02_AG	CM	2015
	681	FJ388902	02_AG	CY	2005
	682	JF683758	02_AG	CY	2007
	683	JF683786	02_AG	CY	2008
	684	JF683792	02_AG	CY	2009
	685	JF683795	02_AG	CY	2009
	686	JF683799	02_AG	CY	2009
	687	JF683806	02_AG	CY	2009
	688	ON989288	02_AG	CY	2018
	689	ON989318	02_AG	CY	2019
	690	KT124792	02_AG	DE	2009
	691	MF157740	02_AG	ES	1999
	692	EU786671	02_AG	ES	2006
	693	EU884501	02_AG	ES	2006
	694	MF157742	02_AG	ES	2009
	695	MK177825	02_AG	ES	2010
	696	MK177826	02_AG	ES	2012
	697	KY989950	02_AG	ES	2014
	698	AB485634	02_AG	FR	-
	699	AF063224	02_AG	FR	1991
	700	OP994781	02_AG	FR	2015
	701	MF109381	02_AG	GB	2013
	702	MF109657	02_AG	GB	2013
	703	MF109709	02_AG	GB	2013
	704	MF109432	02_AG	GB	2014
	705	MF109439	02_AG	GB	2014
	706	MF109547	02_AG	GB	2014
	707	MF109550	02_AG	GB	2014
	708	MF109559	02_AG	GB	2014
	709	MF109572	02_AG	GB	2014
	710	AB485633	02_AG	GH	-
	711	AB049811	02_AG	GH	1997
	712	AB286855	02_AG	GH	2003
	713	AB286857	02_AG	GH	2003
	714	AB286859	02_AG	GH	2003
	715	AB286862	02_AG	GH	2003
	716	AB286863	02_AG	GH	2003
	717	AB231895	02_AG	GH	2003
	718	AB231896	02_AG	GH	2003
	719	AB231898	02_AG	GH	2003
	720	OQ121846	02_AG	GH	2020
	721	OQ121847	02_AG	GH	2020
	722	OQ121849	02_AG	GH	2020
	723	OQ121850	02_AG	GH	2020
	724	OQ121851	02_AG	GH	2020
	725	OQ121853	02_AG	GH	2020
	726	OQ121856	02_AG	GH	2020
	727	OQ121857	02_AG	GH	2020
	728	OQ121860	02_AG	GH	2020
	729	OQ121862	02_AG	GH	2020
	730	OQ121863	02_AG	GH	2020
	731	OQ121864	02_AG	GH	2020
	732	OQ121865	02_AG	GH	2020
	733	OQ121867	02_AG	GH	2020
	734	OQ121869	02_AG	GH	2020
	735	OQ121876	02_AG	GH	2020
	736	OQ121877	02_AG	GH	2020
	737	OQ121880	02_AG	GH	2020
	738	OQ121883	02_AG	GH	2021
	739	OQ121884	02_AG	GH	2021
	740	OQ121885	02_AG	GH	2021
	741	OQ121886	02_AG	GH	2021
	742	OQ121887	02_AG	GH	2021
	743	OQ121891	02_AG	GH	2021
	744	OQ121892	02_AG	GH	2021
	745	OQ121893	02_AG	GH	2021
	746	OQ121894	02_AG	GH	2021
	747	OQ121895	02_AG	GH	2021
	748	OQ121896	02_AG	GH	2021
	749	OQ121897	02_AG	GH	2021
	750	OQ121899	02_AG	GH	2021
	751	OQ121901	02_AG	GH	2021
	752	OQ121905	02_AG	GH	2021
	753	OQ121907	02_AG	GH	2021
	754	OQ121908	02_AG	GH	2021
	755	OQ121910	02_AG	GH	2021
	756	OQ121842	02_AG	GH	2022
	757	OQ121843	02_AG	GH	2022
	758	OQ121845	02_AG	GH	2022
	759	OQ121854	02_AG	GH	2022
	760	OQ121912	02_AG	GH	2022
	761	OQ121913	02_AG	GH	2022
	762	OQ121915	02_AG	GH	2022
	763	FJ694791	02_AG	GW	2004
	764	FJ694792	02_AG	GW	2005
	765	MN703128	02_AG	GW	2013
	766	MH078541	02_AG	GW	2014
	767	MH078542	02_AG	GW	2014
	768	MH078543	02_AG	GW	2014
	769	MH078544	02_AG	GW	2014
	770	MK397970	02_AG	GW	2014
	771	MH078545	02_AG	GW	2014
	772	MN703129	02_AG	GW	2014
	773	MN703130	02_AG	GW	2014
	774	MT222961	02_AG	GW	2014
	775	MN703132	02_AG	GW	2014
	776	JQ316136	02_AG	KR	2007
	777	KF561435	02_AG	KR	2012
	778	AB485636	02_AG	LR	-
	779	L39106	02_AG	NG	-
	780	DQ168577	02_AG	NG	2001
	781	DQ168578	02_AG	NG	2001
	782	JN248580	02_AG	NG	2006
	783	JN248585	02_AG	NG	2009
	784	JN248589	02_AG	NG	2009
	785	JN248590	02_AG	NG	2009
	786	JN248592	02_AG	NG	2009
	787	KX389639	02_AG	NG	2009
	788	KX389630	02_AG	NG	2009
	789	KX389629	02_AG	NG	2009
	790	KX389624	02_AG	NG	2009
	791	KX389621	02_AG	NG	2010
	792	KX389617	02_AG	NG	2010
	793	KX389614	02_AG	NG	2010
	794	KX389610	02_AG	NG	2010
	795	KX389640	02_AG	NG	2011
	796	KX389643	02_AG	NG	2011
	797	KX389644	02_AG	NG	2011
	798	KY953197	02_AG	NG	2011
	799	KY953198	02_AG	NG	2011
	800	KX389647	02_AG	NG	2012
	801	KX389649	02_AG	NG	2012
	802	KX232616	02_AG	PK	2015
	803	KX232622	02_AG	PK	2015
	804	KX232625	02_AG	PK	2015
	805	MZ427751	02_AG	RU	2015
	806	MZ327288	02_AG	RU	2017
	807	AF107770	02_AG	SE	1994
	808	KP411843	02_AG	SE	2011
	809	KP411844	02_AG	SE	2011
	810	KP411845	02_AG	SE	2011
	811	MF373200	02_AG	SE	2014
	812	AJ251056	02_AG	SN	1998
	813	AJ251057	02_AG	SN	1998
	814	KF716488	02_AG	UG	2010
	815	AY444809	02_AG	US	1999
	816	AY444811	02_AG	US	2000
	817	JF320297	02_AG	US	2006
	818	AF414006	03_A6B	BY	2000
	819	MF109476	03_A6B	GB	2013
	820	AF193276	03_A6B	RU	1997
	821	AF193277	03_A6B	RU	1998
	822	AF049337	04_cpx	CY	1994
	823	FJ388917	04_cpx	CY	2005
	824	AF119820	04_cpx	GR	1991
	825	AF119819	04_cpx	GR	1997
	826	JX140648	04_cpx	GR	2000
	827	AF193253	05_DF	BE	-
	828	AF076998	05_DF	BE	1993
	829	MH746260	05_DF	BG	2009
	830	AY227107	05_DF	ES	1999
	831	AF064699	06_cpx	AU	1996
	832	KU168269	06_cpx	BF	-
	833	AB485660	06_cpx	CD	-
	834	MN153481	06_cpx	CM	2006
	835	MW693026	06_cpx	CN	2018
	836	ON989334	06_cpx	CY	2019
	837	MF109474	06_cpx	GB	2013
	838	MF109651	06_cpx	GB	2013
	839	AB286851	06_cpx	GH	2003
	840	OQ121855	06_cpx	GH	2020
	841	OQ121861	06_cpx	GH	2020
	842	OQ121902	06_cpx	GH	2021
	843	AJ288982	06_cpx	ML	1995
	844	AJ245481	06_cpx	ML	1995
	845	KX389609	06_cpx	NG	2010
	846	DQ400856	06_cpx	RU	2005
	847	AJ288981	06_cpx	SN	1997
	848	AF503396	07_BC	CN	-
	849	AF286226	07_BC	CN	1997
	850	AF286230	07_BC	CN	1998
	851	KC492737	07_BC	CN	2005
	852	EF420986	07_BC	CN	2005
	853	EF368372	07_BC	CN	2005
	854	EF368370	07_BC	CN	2005
	855	EF368371	07_BC	CN	2005
	856	KF250376	07_BC	CN	2006
	857	JX392378	07_BC	CN	2006
	858	JX392379	07_BC	CN	2006
	859	JX392380	07_BC	CN	2006
	860	JX392381	07_BC	CN	2006
	861	JX392382	07_BC	CN	2006
	862	JX392383	07_BC	CN	2006
	863	JX392384	07_BC	CN	2006
	864	KF835494	07_BC	CN	2007
	865	KF835510	07_BC	CN	2007
	866	KF835511	07_BC	CN	2007
	867	KF835532	07_BC	CN	2007
	868	KF250366	07_BC	CN	2007
	869	JQ423923	07_BC	CN	2007
	870	KF250371	07_BC	CN	2007
	871	KF250372	07_BC	CN	2007
	872	KF250373	07_BC	CN	2007
	873	KF250374	07_BC	CN	2007
	874	KF250375	07_BC	CN	2007
	875	KF250385	07_BC	CN	2007
	876	KF250377	07_BC	CN	2007
	877	JX960601	07_BC	CN	2008
	878	HQ215552	07_BC	CN	2008
	879	JX960600	07_BC	CN	2009
	880	JX960602	07_BC	CN	2009
	881	OM373318	07_BC	CN	2016
	882	MN659380	07_BC	CN	2018
	883	MF109555	07_BC	GB	2014
	884	MT021910	07_BC	KR	2016
	885	DQ230841	07_BC	TW	2004
	886	KF234628	07_BC	TW	2013
	887	MT635171	07_BC	VN	2013
	888	AY008715	08_BC	CN	1997
	889	AY008716	08_BC	CN	1997
	890	AY008717	08_BC	CN	1997
	891	AF286229	08_BC	CN	1998
	892	AP005206	08_BC	CN	2000
	893	AB773884	08_BC	CN	2000
	894	AB746344	08_BC	CN	2000
	895	KC914396	08_BC	CN	2000
	896	AB750369	08_BC	CN	2001
	897	AB746342	08_BC	CN	2001
	898	HM067748	08_BC	CN	2006
	899	KF835493	08_BC	CN	2007
	900	KF835495	08_BC	CN	2007
	901	KF835496	08_BC	CN	2007
	902	KF835497	08_BC	CN	2007
	903	KF835500	08_BC	CN	2007
	904	KF835501	08_BC	CN	2007
	905	KF835506	08_BC	CN	2007
	906	KF835507	08_BC	CN	2007
	907	KF835508	08_BC	CN	2007
	908	KF835509	08_BC	CN	2007
	909	KF835512	08_BC	CN	2007
	910	KF835529	08_BC	CN	2007
	911	KF835530	08_BC	CN	2007
	912	KF835531	08_BC	CN	2007
	913	KF835535	08_BC	CN	2007
	914	KF835534	08_BC	CN	2007
	915	KF835541	08_BC	CN	2007
	916	KF835545	08_BC	CN	2007
	917	KF835547	08_BC	CN	2007
	918	JF719819	08_BC	CN	2007
	919	KF250368	08_BC	CN	2007
	920	KF250369	08_BC	CN	2007
	921	AJ866553	09_cpx	CI	2000
	922	AY093605	09_cpx	GH	1996
	923	AY093603	09_cpx	SN	1995
	924	AY093604	09_cpx	SN	1995
	925	AY093607	09_cpx	US	1999
	926	AF289548	10_CD	TZ	1996
	927	AF289549	10_CD	TZ	1996
	928	AF289550	10_CD	TZ	1996
	929	MH909568	100_01C	CN	2013
	930	MH909569	100_01C	CN	2013
	931	MH909570	100_01C	CN	2013
	932	KF835546	101_01B	CN	2007
	933	MK158946	101_01B	CN	2013
	934	MK158945	101_01B	CN	2013
	935	MN178644	102_0107	CN	2017
	936	MN178645	102_0107	CN	2018
	937	MH388438	103_01B	CN	2015
	938	OP157185	103_01B	CN	2017
	939	OP157186	103_01B	CN	2017
	940	OP157189	103_01B	CN	2017
	941	OP157184	103_01B	CN	2018
	942	MN067222	103_01B	CN	2018
	943	MN067223	103_01B	CN	2018
	944	MN067224	103_01B	CN	2018
	945	OP157187	103_01B	CN	2019
	946	OP157188	103_01B	CN	2020
	947	MH396608	104_0107	CN	2015
	948	MH396609	104_0107	CN	2015
	949	MK564326	104_0107	CN	2018
	950	KX353919	105_0108	CN	2014
	951	MN752125	105_0108	CN	2017
	952	MN752126	105_0108	CN	2017
	953	MN752127	105_0108	CN	2018
	954	MN752128	105_0108	CN	2018
	955	MT277001	106_cpx	CN	2015
	956	MT277002	106_cpx	CN	2015
	957	MT276997	106_cpx	CN	2017
	958	MT276998	106_cpx	CN	2017
	959	MT276999	106_cpx	CN	2018
	960	MT277000	106_cpx	CN	2018
	961	MT712388	107_01B	CN	2018
	962	MT712389	107_01B	CN	2018
	963	MT712390	107_01B	CN	2018
	964	MT712391	107_01B	CN	2018
	965	MN172222	108_BC	ES	2016
	966	MT559132	108_BC	ES	2017
	967	MN172225	108_BC	ES	2017
	968	MN172223	108_BC	ES	2018
	969	MN172224	108_BC	ES	2018
	970	MT919517	109_0107	CN	2014
	971	MT919518	109_0107	CN	2014
	972	KU168270	11_cpx	-	2003
	973	AF492624	11_cpx	CM	1995
	974	AF492623	11_cpx	CM	1996
	975	AJ291718	11_cpx	CM	1997
	976	AY371149	11_cpx	CM	2001
	977	AY371150	11_cpx	CM	2001
	978	AY371151	11_cpx	CM	2002
	979	AY371153	11_cpx	CM	2002
	980	KP718934	11_cpx	CM	2002
	981	KP718937	11_cpx	CM	2004
	982	KP718938	11_cpx	CM	2004
	983	KP718936	11_cpx	CM	2004
	984	KP718914	11_cpx	CM	2006
	985	KR822830	11_cpx	CM	2007
	986	KP718929	11_cpx	CM	2008
	987	KY658700	11_cpx	CM	2011
	988	KP109503	11_cpx	CM	2011
	989	JF683802	11_cpx	CY	2009
	990	AJ291719	11_cpx	FR	1999
	991	AJ291720	11_cpx	FR	1999
	992	AF179368	11_cpx	GR	-
	993	KX389633	11_cpx	NG	2009
	994	MF373206	11_cpx	SE	2016
	995	KF835524	110_BC	CN	2007
	996	KC898987	110_BC	CN	2009
	997	MW419275	110_BC	CN	2012
	998	MT624751	111_01C	CN	2016
	999	MT624752	111_01C	CN	2016
	1000	MT624754	111_01C	CN	2016
	1001	MT624755	111_01C	CN	2016
	1002	MZ327297	111_01C	CN	2016
	1003	MZ327298	111_01C	CN	2016
	1004	MZ327299	111_01C	CN	2016
	1005	MZ327300	111_01C	CN	2019
	1006	MW018130	112_01B	CN	2018
	1007	MW018133	112_01B	CN	2018
	1008	MW018134	112_01B	CN	2018
	1009	MW018137	112_01B	CN	2019
	1010	MW018132	113_0107	CN	2017
	1011	MW018135	113_0107	CN	2019
	1012	MW018136	113_0107	CN	2019
	1013	MN654104	114_0155	CN	2018
	1014	MN654105	114_0155	CN	2018
	1015	MN654106	114_0155	CN	2019
	1016	MN654107	114_0155	CN	2019
	1017	MN654108	114_0155	CN	2019
	1018	MT650723	114_0155	CN	2019
	1019	MN654109	114_0155	CN	2019
	1020	KJ778896	115_01C	CN	2012
	1021	KJ778895	115_01C	CN	2013
	1022	KY201177	117_0107	CN	2013
	1023	MZ076687	117_0107	CN	2014
	1024	MK397789	117_0107	CN	2017
	1025	KF250409	118_BC	CN	2012
	1026	MT347589	119_0107	CN	2017
	1027	MT347592	119_0107	CN	2017
	1028	MT347593	119_0107	CN	2017
	1029	MT347594	119_0107	CN	2017
	1030	MT347595	119_0107	CN	2017
	1031	MT347596	119_0107	CN	2017
	1032	MT347597	119_0107	CN	2017
	1033	AF408631	12_BF	AR	1997
	1034	AF408629	12_BF	AR	1997
	1035	AF408630	12_BF	AR	1997
	1036	AY037266	12_BF	AR	1998
	1037	AF332867	12_BF	AR	1999
	1038	AF408627	12_BF	AR	1999
	1039	AY037280	12_BF	AR	1999
	1040	AF385936	12_BF	AR	1999
	1041	MT712270	12_BF	CN	2018
	1042	MF157739	12_BF	ES	2000
	1043	JN235963	12_BF	UY	1999
	1044	AY037272	12_BF	UY	1999
	1045	AF385934	12_BF	UY	1999
	1046	AF385935	12_BF	UY	1999
	1047	ON351495	120_0107	CN	2015
	1048	OK662596	120_0107	CN	2015
	1049	OK662597	120_0107	CN	2015
	1050	KJ184180	121_0107	CN	2011
	1051	MZ076688	121_0107	CN	2014
	1052	MZ076689	121_0107	CN	2015
	1053	OK584016	121_0107	CN	2016
	1054	KC113006	122_BF1	ES	2009
	1055	OL982312	122_BF1	ES	2011
	1056	OL982321	122_BF1	ES	2012
	1057	OL982314	122_BF1	ES	2018
	1058	OM025084	123_0107	CN	2020
	1059	OM025085	123_0107	CN	2020
	1060	OM025086	123_0107	CN	2020
	1061	ON962802	124_cpx	AO	2009
	1062	ON962803	124_cpx	AO	2009
	1063	ON054291	125_0107	CN	2018
	1064	ON054293	125_0107	CN	2018
	1065	ON054294	125_0107	CN	2018
	1066	ON054292	125_0107	CN	2018
	1067	ON456389	126_0755	CN	2018
	1068	ON456390	126_0755	CN	2019
	1069	ON456387	126_0755	CN	2021
	1070	ON456388	126_0755	CN	2021
	1071	ON989239	129_56G	CY	2017
	1072	OP781327	129_56G	CY	2018
	1073	ON989282	129_56G	CY	2018
	1074	ON989283	129_56G	CY	2018
	1075	ON989285	129_56G	CY	2018
	1076	ON989289	129_56G	CY	2018
	1077	ON989341	129_56G	CY	2019
	1078	AF460972	13_cpx	CM	1996
	1079	AF460974	13_cpx	CM	1996
	1080	AY371154	13_cpx	CM	2002
	1081	DQ845388	13_cpx	CM	2002
	1082	DQ845386	13_cpx	CM	2004
	1083	DQ845387	13_cpx	CM	2004
	1084	MH705141	13_cpx	CM	2006
	1085	KP718924	13_cpx	CM	2008
	1086	KP718926	13_cpx	CM	2008
	1087	MF109417	13_cpx	GB	2014
	1088	OP781326	130_A1B	CY	2017
	1089	ON901788	132_94B	FR	2019
	1090	ON901787	132_94B	FR	2021
	1091	ON901791	132_94B	FR	2021
	1092	ON901790	132_94B	FR	2021
	1093	ON901789	132_94B	FR	2021
	1094	OP056073	133_A6B	RU	2017
	1095	OP056076	133_A6B	RU	2017
	1096	OP056069	133_A6B	RU	2018
	1097	OP056070	133_A6B	RU	2018
	1098	OP056074	133_A6B	RU	2020
	1099	OP056077	133_A6B	RU	2020
	1100	OP056078	133_A6B	RU	2021
	1101	OP056079	133_A6B	RU	2022
	1102	OQ747186	134_0107	CN	2021
	1103	OQ747187	134_0107	CN	2021
	1104	OQ747188	134_0107	CN	2021
	1105	OQ747189	134_0107	CN	2021
	1106	OQ747190	134_0107	CN	2021
	1107	OQ747191	134_0107	CN	2021
	1108	OP716032	137_0107	CN	2018
	1109	OP716033	137_0107	CN	2018
	1110	OP716034	137_0107	CN	2019
	1111	OP716035	137_0107	CN	2019
	1112	OP716036	137_0107	CN	2020
	1113	OP716037	137_0107	CN	2020
	1114	OP716038	137_0107	CN	2020
	1115	OP716039	137_0107	CN	2021
	1116	OP716040	137_0107	CN	2021
	1117	ON989215	14_BG	CY	2017
	1118	AF423756	14_BG	ES	1999
	1119	AF423757	14_BG	ES	1999
	1120	AF423758	14_BG	ES	2000
	1121	AF423759	14_BG	ES	2000
	1122	AF450096	14_BG	ES	2000
	1123	AF450097	14_BG	ES	2000
	1124	FJ670517	14_BG	ES	2004
	1125	FJ670518	14_BG	ES	2004
	1126	FJ670522	14_BG	ES	2005
	1127	FJ670528	14_BG	ES	2005
	1128	GU230137	14_BG	PT	2000
	1129	OQ749407	140_0107	CN	2020
	1130	OQ749391	140_0107	CN	2020
	1131	OQ749401	140_0107	CN	2020
	1132	MW728361	140_0107	CN	2020
	1133	OQ749396	140_0107	CN	2021
	1134	OQ948241	143_cpx	CN	2013
	1135	OQ948240	143_cpx	CN	2020
	1136	OQ948242	143_cpx	CN	2021
	1137	DQ354120	15_01B	TH	1996
	1138	AF516184	15_01B	TH	1999
	1139	AF530576	15_01B	TH	1999
	1140	AF529572	15_01B	TH	2002
	1141	AF529573	15_01B	TH	2002
	1142	JN248325	15_01B	TH	2004
	1143	JN248351	15_01B	TH	2005
	1144	JN248352	15_01B	TH	2005
	1145	AY945736	16_A2D	KE	1991
	1146	KT022403	16_A2D	KE	2005
	1147	KT022406	16_A2D	KE	2005
	1148	AF286239	16_A2D	KR	1997
	1149	AY037281	17_BF1	AR	1999
	1150	EU581826	17_BF1	AR	2002
	1151	EU581827	17_BF1	BO	2002
	1152	EU581828	17_BF1	PE	2002
	1153	EU581824	17_BF1	PY	2002
	1154	EU581823	17_BF1	PY	2002
	1155	AF377959	18_cpx	CM	1997
	1156	MN153475	18_cpx	CM	2010
	1157	KP718931	18_cpx	CM	2011
	1158	AY586541	18_cpx	CU	1999
	1159	AY894993	18_cpx	CU	1999
	1160	AY586540	18_cpx	CU	1999
	1161	MF109378	18_cpx	GB	2013
	1162	AY588971	19_cpx	CU	1999
	1163	AY588970	19_cpx	CU	1999
	1164	AY894994	19_cpx	CU	1999
	1165	KU685581	19_cpx	ES	2014
	1166	KU685582	19_cpx	ES	2014
	1167	AY586545	20_BG	CU	1999
	1168	DQ020274	20_BG	CU	2003
	1169	AY586544	20_BG	ES	1999
	1170	KT276270	20_BG	ES	2014
	1171	MW062973	20_BG	US	2018
	1172	AY945737	21_A2D	KE	1991
	1173	AF457051	21_A2D	KE	1999
	1174	AF457072	21_A2D	KE	1999
	1175	AY371159	22_01A1	CM	2001
	1176	EU743963	22_01A1	CM	2002
	1177	AY371165	22_01A1	CM	2002
	1178	GQ229529	22_01A1	CM	2002
	1179	JN864049	22_01A1	CM	2006
	1180	MN153487	22_01A1	CM	2008
	1181	MT349410	22_01A1	CM	2010
	1182	MT349413	22_01A1	CM	2010
	1183	KP109498	22_01A1	CM	2010
	1184	KP109499	22_01A1	CM	2010
	1185	KP109500	22_01A1	CM	2010
	1186	JN864050	22_01A1	CM	2010
	1187	JN864051	22_01A1	CM	2010
	1188	JN864058	22_01A1	CM	2010
	1189	JN864059	22_01A1	CM	2010
	1190	AY900571	23_BG	CU	2003
	1191	AY900572	23_BG	CU	2003
	1192	AY900574	24_BG	CU	2003
	1193	AY900575	24_BG	CU	2003
	1194	AY900576	24_BG	CU	2003
	1195	FJ670526	24_BG	ES	2008
	1196	KY392772	25_cpx	CD	2002
	1197	DQ826726	25_cpx	CM	2001
	1198	AY371169	25_cpx	CM	2002
	1199	EU693240	25_cpx	CM	2006
	1200	EU697906	25_cpx	SA	2003
	1201	EU697908	25_cpx	SA	2003
	1202	FM877777	26_A5U	CD	1997
	1203	FM877780	26_A5U	CD	2002
	1204	FM877781	26_A5U	CD	2002
	1205	FM877782	26_A5U	CD	2002
	1206	AJ404325	27_cpx	CD	1997
	1207	MN116204	27_cpx	CD	2003
	1208	AM851091	27_cpx	FR	2004
	1209	DQ085872	28_BF1	BR	1999
	1210	DQ085873	28_BF1	BR	1999
	1211	DQ085874	28_BF1	BR	1999
	1212	JF804809	28_BF1	BR	2005
	1213	JF804812	28_BF1	BR	2005
	1214	AY455778	29_BF1	BR	1999
	1215	DQ085871	29_BF1	BR	1999
	1216	DQ085876	29_BF1	BR	2001
	1217	JF804806	29_BF1	BR	2005
	1218	JF804807	29_BF1	BR	2005
	1219	JF804811	29_BF1	BR	2005
	1220	AB286854	30_0206	GH	2003
	1221	AJ508595	30_0206	NE	1997
	1222	AJ508597	30_0206	NE	2000
	1223	EF091932	31_BC	BR	2002
	1224	AY727526	31_BC	BR	2004
	1225	AY727527	31_BC	BR	2004
	1226	AY535660	32_06A6	EE	2001
	1227	DQ167215	32_06A6	EE	2002
	1228	KM606632	32_06A6	EE	2006
	1229	AB547463	33_01B	ID	2007
	1230	AB547464	33_01B	ID	2007
	1231	DQ366659	33_01B	MY	2005
	1232	DQ366660	33_01B	MY	2005
	1233	DQ366661	33_01B	MY	2005
	1234	DQ366662	33_01B	MY	2005
	1235	EU031913	33_01B	MY	2007
	1236	EF165539	34_01B	TH	1999
	1237	EF165540	34_01B	TH	1999
	1238	EF165541	34_01B	TH	1999
	1239	EF158043	35_A1D	AF	2005
	1240	EF158040	35_A1D	AF	2005
	1241	EF158041	35_A1D	AF	2005
	1242	EF158042	35_A1D	AF	2005
	1243	GQ477450	35_A1D	AF	2006
	1244	GQ477451	35_A1D	AF	2006
	1245	GQ477443	35_A1D	AF	2006
	1246	GQ477444	35_A1D	AF	2006
	1247	GQ477445	35_A1D	AF	2006
	1248	GQ477442	35_A1D	AF	2006
	1249	GQ477446	35_A1D	AF	2007
	1250	GQ477449	35_A1D	AF	2007
	1251	GQ477448	35_A1D	AF	2007
	1252	AB703607	35_A1D	IR	2010
	1253	AB703608	35_A1D	IR	2010
	1254	AB703615	35_A1D	IR	2010
	1255	AB703609	35_A1D	IR	2011
	1256	AB703611	35_A1D	IR	2011
	1257	AB703612	35_A1D	IR	2011
	1258	AB703610	35_A1D	IR	2011
	1259	AB703613	35_A1D	IR	2011
	1260	AB703614	35_A1D	IR	2011
	1261	EF087995	36_cpx	CM	2000
	1262	EF087994	36_cpx	CM	2000
	1263	KR017774	36_cpx	CM	2007
	1264	AF377957	37_cpx	CM	1997
	1265	EF116594	37_cpx	CM	2000
	1266	KP718917	37_cpx	CM	2006
	1267	JF683745	37_cpx	CY	2007
	1268	JN235962	38_BF1	UY	1999
	1269	FJ213783	38_BF1	UY	2003
	1270	FJ213781	38_BF1	UY	2004
	1271	FJ213782	38_BF1	UY	2004
	1272	FJ213780	38_BF1	UY	2005
	1273	EU735534	39_BF1	BR	2003
	1274	EU735536	39_BF1	BR	2003
	1275	EU735535	39_BF1	BR	2004
	1276	EU735538	40_BF1	BR	2004
	1277	EU735540	40_BF1	BR	2004
	1278	EU735537	40_BF1	BR	2005
	1279	EU735539	40_BF1	BR	2005
	1280	KX907417	41_CD	TZ	2003
	1281	KX907430	41_CD	TZ	2003
	1282	KX907411	41_CD	TZ	2005
	1283	EU170151	42_BF1	LU	2003
	1284	EU170154	42_BF1	LU	2003
	1285	EU170148	42_BF1	LU	2003
	1286	EU170155	42_BF1	LU	2003
	1287	EU170145	42_BF1	LU	2003
	1288	EU170140	42_BF1	LU	2003
	1289	EU170147	42_BF1	LU	2003
	1290	EU170150	42_BF1	LU	2003
	1291	EU170146	42_BF1	LU	2004
	1292	EU170142	42_BF1	LU	2004
	1293	EU170136	42_BF1	LU	2005
	1294	EU170144	42_BF1	LU	2005
	1295	EU170153	42_BF1	LU	2005
	1296	EU170143	42_BF1	LU	2005
	1297	EU170139	42_BF1	LU	2006
	1298	EU170138	42_BF1	LU	2006
	1299	EU170141	42_BF1	LU	2006
	1300	MF109648	43_02G	GB	2013
	1301	EU697904	43_02G	SA	2003
	1302	EU697905	43_02G	SA	2003
	1303	EU697907	43_02G	SA	2003
	1304	EU697909	43_02G	SA	2003
	1305	FJ358521	44_BF1	CL	2000
	1306	AY536235	44_BF1	CL	2001
	1307	MH078557	44_BF1	PE	2016
	1308	FN392874	45_cpx	CD	1997
	1309	FN392875	45_cpx	CD	1997
	1310	FN392876	45_cpx	CM	1997
	1311	EU448295	45_cpx	FR	2004
	1312	FN392877	45_cpx	GA	1997
	1313	DQ358801	46_BF1	BR	2001
	1314	DQ358802	46_BF1	BR	2001
	1315	MG365771	46_BF1	BR	2001
	1316	HM026456	46_BF1	BR	2007
	1317	HM026457	46_BF1	BR	2007
	1318	HM026458	46_BF1	BR	2007
	1319	HM026459	46_BF1	BR	2007
	1320	HM026460	46_BF1	BR	2007
	1321	KJ849798	47_BF1	BR	2010
	1322	GQ372987	47_BF1	ES	2008
	1323	FJ670529	47_BF1	ES	2008
	1324	GQ175881	48_01B	MY	2007
	1325	GQ175882	48_01B	MY	2007
	1326	GQ175883	48_01B	MY	2007
	1327	AF192135	49_cpx	BW	1998
	1328	HQ385478	49_cpx	GM	1997
	1329	HQ385477	49_cpx	GM	2002
	1330	HQ385479	49_cpx	GM	2003
	1331	JN417236	50_A1D	GB	2000
	1332	JN417239	50_A1D	GB	2003
	1333	JN417237	50_A1D	GB	2003
	1334	JN417241	50_A1D	GB	2010
	1335	JN417240	50_A1D	GB	2010
	1336	LC312713	51_01B	MN	2009
	1337	LC312714	51_01B	MN	2012
	1338	LC312715	51_01B	MN	2013
	1339	KJ485698	51_01B	MY	2009
	1340	KJ485697	51_01B	MY	2011
	1341	JN029801	51_01B	SG	2011
	1342	JN029803	51_01B	SG	2011
	1343	DQ366664	52_01B	MY	2003
	1344	DQ354113	52_01B	TH	1996
	1345	AY945734	52_01B	TH	2000
	1346	DQ366663	53_01B	MY	2004
	1347	JX390612	53_01B	MY	2010
	1348	JX390611	53_01B	MY	2010
	1349	JX390610	53_01B	MY	2011
	1350	EU031915	54_01B	MY	2007
	1351	JX390977	54_01B	MY	2008
	1352	JX390976	54_01B	MY	2009
	1353	JF340054	55_01B	CN	2008
	1354	JX574661	55_01B	CN	2010
	1355	KF927151	55_01B	CN	2011
	1356	KF927150	55_01B	CN	2011
	1357	KC183777	55_01B	CN	2011
	1358	JX574663	55_01B	CN	2011
	1359	JX574662	55_01B	CN	2011
	1360	MW110767	55_01B	CN	2015
	1361	MW110768	55_01B	CN	2015
	1362	ON989265	56_cpx	CY	2017
	1363	KC852172	56_cpx	FR	2010
	1364	KC852174	56_cpx	FR	2010
	1365	JN882655	56_cpx	FR	2010
	1366	KC852173	56_cpx	FR	2011
	1367	MZ327290	56_cpx	RU	2017
	1368	MN736702	56_cpx	SI	2012
	1369	HM776939	57_BC	CN	2007
	1370	KC898985	57_BC	CN	2009
	1371	KC898991	57_BC	CN	2009
	1372	KC899008	57_BC	CN	2009
	1373	JX679207	57_BC	CN	2009
	1374	KC870044	57_BC	CN	2009
	1375	KF250400	57_BC	CN	2010
	1376	KC522031	58_01B	MY	2009
	1377	KC522035	58_01B	MY	2010
	1378	KF425293	58_01B	MY	2010
	1379	KC522034	58_01B	MY	2011
	1380	KC522033	58_01B	MY	2011
	1381	KC522032	58_01B	MY	2011
	1382	KF011494	59_01B	CN	2007
	1383	KF011495	59_01B	CN	2007
	1384	JX960635	59_01B	CN	2009
	1385	KC462191	59_01B	CN	2010
	1386	KJ484433	59_01B	CN	2011
	1387	KJ484434	59_01B	CN	2011
	1388	KC462190	59_01B	CN	2011
	1389	KJ484435	59_01B	CN	2012
	1390	JN692442	60_BC	BR	2002
	1391	EU448296	60_BC	FR	2006
	1392	KC899079	60_BC	IT	2011
	1393	KC899080	60_BC	IT	2011
	1394	KC899081	60_BC	IT	2011
	1395	KC990125	61_BC	CN	2007
	1396	KC990126	61_BC	CN	2007
	1397	KC990124	61_BC	CN	2010
	1398	KC870034	62_BC	CN	2010
	1399	KC870035	62_BC	CN	2010
	1400	KC870037	62_BC	CN	2010
	1401	JX500701	63_02A6	RU	2009
	1402	JX500702	63_02A6	RU	2010
	1403	JN230353	63_02A6	RU	2010
	1404	JX500700	63_02A6	RU	2010
	1405	JX500704	63_02A6	RU	2010
	1406	JX500699	63_02A6	RU	2011
	1407	JX500698	63_02A6	RU	2011
	1408	JX500705	63_02A6	RU	2012
	1409	KJ197200	63_02A6	RU	2013
	1410	KJ197201	63_02A6	RU	2013
	1411	KJ197202	63_02A6	RU	2013
	1412	MK984160	63_02A6	RU	2015
	1413	MT334923	63_02A6	RU	2016
	1414	MT369985	63_02A6	RU	2016
	1415	MT369988	63_02A6	RU	2016
	1416	MT369991	63_02A6	RU	2016
	1417	MK984159	63_02A6	RU	2017
	1418	MZ327295	63_02A6	RU	2018
	1419	MZ327296	63_02A6	RU	2018
	1420	MZ427698	63_02A6	RU	2018
	1421	MZ427705	63_02A6	RU	2018
	1422	MZ427775	63_02A6	RU	2019
	1423	MZ427709	63_02A6	RU	2019
	1424	MZ427715	63_02A6	RU	2019
	1425	MZ427716	63_02A6	RU	2019
	1426	MZ427729	63_02A6	RU	2019
	1427	KC898994	64_BC	CN	2009
	1428	KC899009	64_BC	CN	2009
	1429	KC870031	64_BC	CN	2009
	1430	KC870042	64_BC	CN	2009
	1431	KC870043	64_BC	CN	2009
	1432	KC870032	64_BC	CN	2010
	1433	KC870036	64_BC	CN	2010
	1434	KC870040	64_BC	CN	2010
	1435	KC870030	65_cpx	CN	2009
	1436	KC870027	65_cpx	CN	2010
	1437	KC870028	65_cpx	CN	2010
	1438	KC183778	65_cpx	CN	2011
	1439	MN564837	65_cpx	CN	2018
	1440	OK011543	66_BF1	ES	2010
	1441	OK011547	66_BF1	ES	2011
	1442	OK011549	66_BF1	ES	2016
	1443	OK011535	66_BF1	ES	2017
	1444	MK298150	66_BF1	ES	2017
	1445	OK011532	66_BF1	ES	2018
	1446	JN251902	66_BF1	PY	2002
	1447	JN251903	66_BF1	PY	2002
	1448	KC183779	67_01B	CN	2011
	1449	KC183780	67_01B	CN	2011
	1450	KF758551	68_01B	CN	2010
	1451	KC183782	68_01B	CN	2011
	1452	KC183783	68_01B	CN	2011
	1453	ON007374	68_01B	CN	2019
	1454	AB845344	69_01B	JP	2003
	1455	AB845345	69_01B	JP	2004
	1456	AB845346	69_01B	JP	2004
	1457	AB845347	69_01B	JP	2005
	1458	LC027100	69_01B	JP	2005
	1459	AB845348	69_01B	JP	2010
	1460	AB845349	69_01B	JP	2010
	1461	KJ849758	70_BF1	BR	2010
	1462	KJ849775	70_BF1	BR	2010
	1463	KJ849809	70_BF1	BR	2010
	1464	DQ358811	71_BF1	BR	2002
	1465	KJ849759	71_BF1	BR	2010
	1466	KJ849760	71_BF1	BR	2010
	1467	KJ849761	71_BF1	BR	2010
	1468	KJ849762	71_BF1	BR	2010
	1469	KJ849769	71_BF1	BR	2010
	1470	KJ849770	71_BF1	BR	2010
	1471	KJ849771	71_BF1	BR	2010
	1472	KJ849773	71_BF1	BR	2010
	1473	KJ849776	71_BF1	BR	2010
	1474	KJ849777	71_BF1	BR	2010
	1475	KJ849778	71_BF1	BR	2010
	1476	KJ849779	71_BF1	BR	2010
	1477	KT427816	71_BF1	BR	2010
	1478	AY455780	72_BF1	BR	1999
	1479	EF637052	72_BF1	BR	2003
	1480	KJ671534	72_BF1	BR	2010
	1481	KJ671535	72_BF1	BR	2010
	1482	KJ671536	72_BF1	BR	2010
	1483	FJ904244	72_BF1	IT	2008
	1484	AY882421	73_BG	DE	2001
	1485	KM248765	73_BG	ES	2011
	1486	KR019770	74_01B	MY	2010
	1487	KR019771	74_01B	MY	2010
	1488	KR019772	74_01B	MY	2011
	1489	MK341078	75_BF1	ES	2017
	1490	GU595149	75_BF1	IT	2001
	1491	GU595160	75_BF1	IT	2002
	1492	MN187303	76_01B	JP	2012
	1493	MN187302	76_01B	JP	2013
	1494	KX673818	77_cpx	MY	2013
	1495	KX673819	77_cpx	MY	2014
	1496	KX673820	77_cpx	MY	2014
	1497	KX673821	77_cpx	MY	2014
	1498	KY216146	79_0107	CN	2015
	1499	KY216147	79_0107	CN	2015
	1500	KY216148	79_0107	CN	2015
	1501	MW732901	79_0107	CN	2019
	1502	MH843712	80_0107	CN	2011
	1503	MH843713	80_0107	CN	2012
	1504	MH986016	81_cpx	BR	2007
	1505	MH986017	81_cpx	BR	2008
	1506	MF373153	84_A1D	SE	2010
	1507	MF373190	84_A1D	SE	2013
	1508	MF373196	84_A1D	SE	2014
	1509	MK258684	85_BC	CN	2012
	1510	KU992928	85_BC	CN	2014
	1511	KU992935	85_BC	CN	2014
	1512	KU992936	85_BC	CN	2014
	1513	KU992937	85_BC	CN	2014
	1514	KU992929	85_BC	CN	2014
	1515	KU992930	85_BC	CN	2014
	1516	KU992931	85_BC	CN	2014
	1517	KU992932	85_BC	CN	2014
	1518	KU992934	85_BC	CN	2014
	1519	MK258683	85_BC	CN	2014
	1520	KC898992	87_cpx	CN	2009
	1521	KC899012	87_cpx	CN	2009
	1522	KF250408	87_cpx	CN	2012
	1523	KC898975	88_BC	CN	2005
	1524	KC898979	88_BC	CN	2005
	1525	KF250402	88_BC	CN	2009
	1526	AY037271	89_BF1	BO	1999
	1527	KX818199	89_BF1	ES	2010
	1528	KX818200	89_BF1	ES	2012
	1529	MW344920	89_BF1	ES	2016
	1530	MW802822	89_BF1	ES	2017
	1531	MW802825	89_BF1	ES	2018
	1532	MW802823	89_BF1	ES	2019
	1533	MW802824	89_BF1	ES	2020
	1534	MH078556	89_BF1	PE	2013
	1535	KY628216	90_BF1	BR	2007
	1536	KY628218	90_BF1	BR	2007
	1537	KY628225	90_BF1	BR	2009
	1538	KY628219	90_BF1	BR	2010
	1539	KY628223	90_BF1	BR	2010
	1540	KY628221	90_BF1	BR	2011
	1541	OK584018	91_cpx	CY	2017
	1542	OK283056	91_cpx	CY	2018
	1543	OK283057	91_cpx	CY	2018
	1544	OK283058	91_cpx	CY	2018
	1545	OK283059	91_cpx	CY	2019
	1546	OK283060	91_cpx	CY	2019
	1547	OK283061	91_cpx	CY	2019
	1548	OK283062	91_cpx	CY	2019
	1549	OK283063	91_cpx	CY	2020
	1550	OK283064	91_cpx	CY	2020
	1551	KU168263	92_C2U	-	2004
	1552	KY392767	92_C2U	CD	2002
	1553	MF372647	92_C2U	CD	2008
	1554	MF372644	92_C2U	CD	2008
	1555	MF372645	92_C2U	CD	2008
	1556	MF372648	92_C2U	CD	2008
	1557	MF372650	92_C2U	CD	2012
	1558	MF372646	93_cpx	CD	2008
	1559	MF372651	93_cpx	CD	2008
	1560	MF372649	93_cpx	CD	2008
	1561	MH141493	94_cpx	FR	2014
	1562	MH141492	94_cpx	FR	2015
	1563	MH683549	94_cpx	FR	2015
	1564	MH683550	94_cpx	FR	2015
	1565	MH141491	94_cpx	FR	2016
	1566	MH141494	94_cpx	FR	2016
	1567	MH666157	95_02B	NG	2014
	1568	MH666156	95_02B	NG	2015
	1569	MH666155	95_02B	NG	2015
	1570	KF850149	96_cpx	CN	2010
	1571	MG518476	96_cpx	CN	2013
	1572	MG518477	96_cpx	CN	2013
	1573	MG760399	97_01B	LA	2011
	1574	MG760407	97_01B	LA	2011
	1575	MG760379	97_01B	LA	2012
	1576	MG760380	97_01B	LA	2012
	1577	MG760386	97_01B	LA	2012
	1578	MH479275	98_06B	FR	2009
	1579	MH986014	99_BF1	BR	2008
	1580	MH986013	99_BF1	BR	2009
	1581	DQ676872	A1	AU	2003
	1582	MH746259	A1	BG	2009
	1583	MH746258	A1	BG	2009
	1584	MH746253	A1	BG	2009
	1585	MH705158	A1	CD	1987
	1586	MH705151	A1	CD	1987
	1587	MH705153	A1	CD	1987
	1588	MH705133	A1	CD	1987
	1589	KU168256	A1	CD	2002
	1590	KU168305	A1	CM	2003
	1591	MN153491	A1	CM	2006
	1592	KP718918	A1	CM	2007
	1593	KP718928	A1	CM	2008
	1594	MT349418	A1	CM	2011
	1595	FJ388893	A1	CY	2005
	1596	FJ388894	A1	CY	2005
	1597	FJ388903	A1	CY	2005
	1598	FJ388909	A1	CY	2005
	1599	FJ388925	A1	CY	2005
	1600	FJ388932	A1	CY	2005
	1601	FJ388938	A1	CY	2005
	1602	FJ388942	A1	CY	2005
	1603	FJ388943	A1	CY	2006
	1604	FJ388946	A1	CY	2006
	1605	JF683737	A1	CY	2007
	1606	JF683759	A1	CY	2007
	1607	JF683760	A1	CY	2007
	1608	JF683761	A1	CY	2007
	1609	JF683767	A1	CY	2008
	1610	JF683779	A1	CY	2008
	1611	JF683782	A1	CY	2008
	1612	JF683783	A1	CY	2008
	1613	JF683789	A1	CY	2009
	1614	FJ670519	A1	ES	2005
	1615	FJ670523	A1	ES	2006
	1616	KY496622	A1	ES	2015
	1617	MK177829	A1	ES	2016
	1618	MF109677	A1	GB	2013
	1619	MF109679	A1	GB	2013
	1620	MF109427	A1	GB	2014
	1621	MF109613	A1	GB	2014
	1622	MF109623	A1	GB	2014
	1623	KT152840	A1	IN	1997
	1624	KT152841	A1	IN	1999
	1625	KT152842	A1	IN	1999
	1626	KT152843	A1	IN	1999
	1627	KT152846	A1	IN	2000
	1628	KT152839	A1	IN	2009
	1629	AY322184	A1	KE	1986
	1630	AF539405	A1	KE	1986
	1631	AF004885	A1	KE	1994
	1632	AY322190	A1	KE	1997
	1633	AY322193	A1	KE	1997
	1634	AF457063	A1	KE	1999
	1635	AF457065	A1	KE	1999
	1636	AF457075	A1	KE	1999
	1637	AF457052	A1	KE	2000
	1638	AF457053	A1	KE	2000
	1639	AF457055	A1	KE	2000
	1640	AF457066	A1	KE	2000
	1641	AF457067	A1	KE	2000
	1642	AF457068	A1	KE	2000
	1643	AF457069	A1	KE	2000
	1644	AF457070	A1	KE	2000
	1645	AF457077	A1	KE	2000
	1646	AF457079	A1	KE	2000
	1647	AF457080	A1	KE	2000
	1648	AF457081	A1	KE	2000
	1649	AF457083	A1	KE	2000
	1650	AF457084	A1	KE	2000
	1651	AF457086	A1	KE	2000
	1652	AF457089	A1	KE	2000
	1653	EU110087	A1	KE	2001
	1654	EU110088	A1	KE	2001
	1655	EU110092	A1	KE	2002
	1656	EU110094	A1	KE	2002
	1657	KT022360	A1	KE	2004
	1658	KT022361	A1	KE	2004
	1659	KT022363	A1	KE	2004
	1660	KT022364	A1	KE	2004
	1661	KT022365	A1	KE	2004
	1662	KT022367	A1	KE	2004
	1663	KT022368	A1	KE	2004
	1664	KT022369	A1	KE	2004
	1665	KT022370	A1	KE	2005
	1666	KT022372	A1	KE	2005
	1667	KT022373	A1	KE	2005
	1668	KT022374	A1	KE	2005
	1669	KT022375	A1	KE	2005
	1670	KT022376	A1	KE	2005
	1671	KT022377	A1	KE	2005
	1672	KT022378	A1	KE	2006
	1673	KT022380	A1	KE	2006
	1674	KT022381	A1	KE	2006
	1675	KT022382	A1	KE	2006
	1676	KT022383	A1	KE	2006
	1677	KT022384	A1	KE	2006
	1678	FJ623487	A1	KE	2006
	1679	FJ623481	A1	KE	2006
	1680	FJ623475	A1	KE	2006
	1681	FJ623476	A1	KE	2006
	1682	FJ623480	A1	KE	2006
	1683	FJ623485	A1	KE	2006
	1684	FJ623483	A1	KE	2006
	1685	FJ623488	A1	KE	2006
	1686	FJ623478	A1	KE	2006
	1687	FJ623482	A1	KE	2006
	1688	FJ623477	A1	KE	2006
	1689	FJ623484	A1	KE	2006
	1690	FJ623486	A1	KE	2006
	1691	FJ623479	A1	KE	2006
	1692	MN791363	A1	KE	2010
	1693	MW443147	A1	KE	2011
	1694	MW443157	A1	KE	2011
	1695	MN791333	A1	KE	2011
	1696	MN791710	A1	KE	2011
	1697	KF716474	A1	KE	2011
	1698	KF716475	A1	KE	2011
	1699	KU749409	A1	PK	2014
	1700	KU749410	A1	PK	2014
	1701	KU749411	A1	PK	2014
	1702	KX232597	A1	PK	2014
	1703	KX232600	A1	PK	2014
	1704	KX232607	A1	PK	2014
	1705	KX232609	A1	PK	2014
	1706	KX232610	A1	PK	2014
	1707	KX232611	A1	PK	2014
	1708	KX232613	A1	PK	2014
	1709	KX232619	A1	PK	2014
	1710	KX232614	A1	PK	2015
	1711	KX232618	A1	PK	2015
	1712	KX232620	A1	PK	2015
	1713	KX232621	A1	PK	2015
	1714	KX232624	A1	PK	2015
	1715	KX232626	A1	PK	2015
	1716	AB253421	A1	RW	1992
	1717	AB287376	A1	RW	1992
	1718	AY713406	A1	RW	1993
	1719	AB287378	A1	RW	1993
	1720	MT942764	A1	RW	2005
	1721	MT942708	A1	RW	2005
	1722	MT942776	A1	RW	2005
	1723	KU749423	A1	RW	2006
	1724	MT942721	A1	RW	2006
	1725	MT942790	A1	RW	2006
	1726	JX236677	A1	RW	2007
	1727	JX236678	A1	RW	2007
	1728	KP223776	A1	RW	2007
	1729	KP223844	A1	RW	2007
	1730	MT942807	A1	RW	2007
	1731	KU749424	A1	RW	2008
	1732	MT942842	A1	RW	2008
	1733	MT942826	A1	RW	2008
	1734	MT942836	A1	RW	2008
	1735	MT942889	A1	RW	2008
	1736	MT942875	A1	RW	2008
	1737	MT942915	A1	RW	2010
	1738	MT942928	A1	RW	2010
	1739	MT942947	A1	RW	2010
	1740	KF716472	A1	RW	2011
	1741	MZ642267	A1	RW	2016
	1742	MZ642264	A1	RW	2017
	1743	MZ642261	A1	RW	2017
	1744	MZ642260	A1	RW	2017
	1745	MZ642262	A1	RW	2018
	1746	MZ642266	A1	RW	2019
	1747	MZ642263	A1	RW	2019
	1748	MZ642269	A1	RW	2019
	1749	MF373124	A1	SE	1993
	1750	AF069670	A1	SE	1994
	1751	AF069671	A1	SE	1994
	1752	AF069669	A1	SE	1995
	1753	AF069673	A1	SE	1995
	1754	AF107771	A1	SE	1995
	1755	MF373167	A1	SE	2012
	1756	MF373168	A1	SE	2012
	1757	MF373181	A1	SE	2013
	1758	MF373182	A1	SE	2013
	1759	AF361872	A1	TZ	1997
	1760	AF361873	A1	TZ	1997
	1761	AY253305	A1	TZ	2001
	1762	AY253314	A1	TZ	2001
	1763	KX907352	A1	TZ	2002
	1764	KX907348	A1	TZ	2003
	1765	KX907336	A1	TZ	2004
	1766	KX907343	A1	TZ	2004
	1767	KX907372	A1	TZ	2004
	1768	KX907383	A1	TZ	2004
	1769	KX907389	A1	TZ	2004
	1770	KX907341	A1	TZ	2005
	1771	KX907347	A1	TZ	2005
	1772	KX907364	A1	TZ	2005
	1773	KX907401	A1	TZ	2005
	1774	KX907412	A1	TZ	2005
	1775	KX228815	A1	TZ	2005
	1776	KX907346	A1	TZ	2006
	1777	KX907378	A1	TZ	2006
	1778	KX907414	A1	TZ	2006
	1779	KX907423	A1	TZ	2006
	1780	KX907431	A1	TZ	2006
	1781	KY658694	A1	TZ	2008
	1782	KY658695	A1	TZ	2008
	1783	KY658696	A1	TZ	2008
	1784	MN791853	A1	TZ	2009
	1785	MN791873	A1	TZ	2010
	1786	MN791964	A1	TZ	2012
	1787	AB098330	A1	UG	-
	1788	AB485632	A1	UG	-
	1789	M62320	A1	UG	1985
	1790	OP039451	A1	UG	1986
	1791	OP039454	A1	UG	1986
	1792	OP039455	A1	UG	1986
	1793	OP039467	A1	UG	1986
	1794	OP039468	A1	UG	1986
	1795	OP039473	A1	UG	1986
	1796	OP039474	A1	UG	1986
	1797	OP039477	A1	UG	1986
	1798	OP039479	A1	UG	1986
	1799	OP039481	A1	UG	1986
	1800	OP039485	A1	UG	1986
	1801	OP039384	A1	UG	1986
	1802	OP039408	A1	UG	1986
	1803	AB253428	A1	UG	1992
	1804	AB098332	A1	UG	1992
	1805	AF484507	A1	UG	1998
	1806	AF484508	A1	UG	1998
	1807	AF484509	A1	UG	1998
	1808	AF484512	A1	UG	1998
	1809	AF484478	A1	UG	1999
	1810	AF484493	A1	UG	1999
	1811	JX236669	A1	UG	2007
	1812	JX236671	A1	UG	2007
	1813	JX236676	A1	UG	2007
	1814	KF716478	A1	UG	2009
	1815	KP109490	A1	UG	2009
	1816	MN791279	A1	UG	2010
	1817	KX228810	A1	UG	2010
	1818	MN791169	A1	UG	2011
	1819	MN791209	A1	UG	2011
	1820	KF859745	A1	UG	2011
	1821	KF716486	A1	UG	2011
	1822	OQ686199	A1	UG	2017
	1823	OQ686381	A1	UG	2019
	1824	KJ948658	A1	ZA	2000
	1825	KT183312	A1	ZA	2004
	1826	MH705163	A2	CD	1987
	1827	AF286238	A2	CD	1997
	1828	GU201516	A2	CM	2001
	1829	AF286237	A2	CY	1994
	1830	AY521630	A3	SN	1996
	1831	AY521629	A3	SN	2001
	1832	AY521631	A3	SN	2001
	1833	AM000053	A4	CD	1997
	1834	AM000054	A4	CD	1997
	1835	AM000055	A4	CD	2002
	1836	MN485977	A6	BE	2014
	1837	KT983615	A6	BY	2013
	1838	FJ388892	A6	CY	2005
	1839	FJ388906	A6	CY	2005
	1840	FJ388950	A6	CY	2006
	1841	FJ388951	A6	CY	2006
	1842	JF683763	A6	CY	2007
	1843	JF683780	A6	CY	2008
	1844	JF683798	A6	CY	2009
	1845	ON989220	A6	CY	2017
	1846	ON989294	A6	CY	2018
	1847	ON989303	A6	CY	2018
	1848	ON989335	A6	CY	2019
	1849	MF109697	A6	GB	2013
	1850	DQ207944	A6	GE	1999
	1851	EU861977	A6	IT	2002
	1852	EF589042	A6	KZ	2002
	1853	EF589043	A6	KZ	2002
	1854	EF589039	A6	KZ	2002
	1855	EF589044	A6	KZ	2002
	1856	EF589040	A6	KZ	2002
	1857	EF589041	A6	KZ	2002
	1858	MH330357	A6	RU	-
	1859	EF545108	A6	RU	2000
	1860	JQ292892	A6	RU	2002
	1861	AY500393	A6	RU	2003
	1862	JQ292895	A6	RU	2005
	1863	JQ292896	A6	RU	2006
	1864	JQ292897	A6	RU	2006
	1865	JQ292898	A6	RU	2006
	1866	JQ292899	A6	RU	2006
	1867	JQ292900	A6	RU	2006
	1868	JQ292891	A6	RU	2007
	1869	KF716491	A6	RU	2008
	1870	KF716492	A6	RU	2008
	1871	KY238326	A6	RU	2008
	1872	FJ864679	A6	RU	2008
	1873	JQ292893	A6	RU	2008
	1874	JQ292894	A6	RU	2008
	1875	JX500696	A6	RU	2010
	1876	JX500695	A6	RU	2010
	1877	JX500694	A6	RU	2011
	1878	MH330347	A6	RU	2012
	1879	MH330348	A6	RU	2012
	1880	MH330349	A6	RU	2012
	1881	MH330350	A6	RU	2012
	1882	MH330351	A6	RU	2012
	1883	MH330352	A6	RU	2012
	1884	MH330353	A6	RU	2012
	1885	MH330354	A6	RU	2012
	1886	MH330355	A6	RU	2012
	1887	MH330356	A6	RU	2012
	1888	MH330358	A6	RU	2012
	1889	MH330359	A6	RU	2012
	1890	MH330363	A6	RU	2012
	1891	MH330364	A6	RU	2012
	1892	MH330365	A6	RU	2012
	1893	MG902950	A6	RU	2013
	1894	MG902951	A6	RU	2013
	1895	MH330337	A6	RU	2013
	1896	MH330338	A6	RU	2013
	1897	MH330339	A6	RU	2013
	1898	MH330340	A6	RU	2013
	1899	MH330341	A6	RU	2013
	1900	MH330342	A6	RU	2013
	1901	MH330343	A6	RU	2013
	1902	MH330344	A6	RU	2013
	1903	MH330345	A6	RU	2013
	1904	MH330346	A6	RU	2013
	1905	MH330370	A6	RU	2013
	1906	MH330371	A6	RU	2013
	1907	MH330372	A6	RU	2013
	1908	MH330373	A6	RU	2013
	1909	MH330374	A6	RU	2013
	1910	MH330376	A6	RU	2013
	1911	MH330378	A6	RU	2013
	1912	MN703135	A6	RU	2014
	1913	MT222944	A6	RU	2014
	1914	MT222945	A6	RU	2014
	1915	MT222946	A6	RU	2014
	1916	MT222947	A6	RU	2014
	1917	MN703136	A6	RU	2014
	1918	MT222948	A6	RU	2014
	1919	MN703137	A6	RU	2014
	1920	MH330379	A6	RU	2014
	1921	MH330380	A6	RU	2014
	1922	MZ427727	A6	RU	2014
	1923	MT222949	A6	RU	2015
	1924	MT318157	A6	RU	2015
	1925	MZ427717	A6	RU	2015
	1926	MT334908	A6	RU	2015
	1927	MT334909	A6	RU	2015
	1928	MT334913	A6	RU	2015
	1929	MZ427723	A6	RU	2015
	1930	MZ427722	A6	RU	2015
	1931	MN703138	A6	RU	2016
	1932	MN703139	A6	RU	2016
	1933	MT334916	A6	RU	2016
	1934	MT334921	A6	RU	2016
	1935	MT334924	A6	RU	2016
	1936	MT334926	A6	RU	2016
	1937	MT334927	A6	RU	2016
	1938	MT334928	A6	RU	2016
	1939	MT334929	A6	RU	2016
	1940	MT334930	A6	RU	2016
	1941	MT334932	A6	RU	2016
	1942	MT369950	A6	RU	2016
	1943	MT369951	A6	RU	2016
	1944	MT369952	A6	RU	2016
	1945	MT369953	A6	RU	2016
	1946	MT369955	A6	RU	2016
	1947	MT369956	A6	RU	2016
	1948	MT369957	A6	RU	2016
	1949	MT369961	A6	RU	2016
	1950	MT369963	A6	RU	2016
	1951	MT369965	A6	RU	2016
	1952	MT369966	A6	RU	2016
	1953	MT369967	A6	RU	2016
	1954	MT369972	A6	RU	2016
	1955	MT369973	A6	RU	2016
	1956	MT369974	A6	RU	2016
	1957	MT369975	A6	RU	2016
	1958	MT369978	A6	RU	2016
	1959	MT369980	A6	RU	2016
	1960	MT369982	A6	RU	2016
	1961	MT369984	A6	RU	2016
	1962	MT369987	A6	RU	2016
	1963	MT369993	A6	RU	2016
	1964	MT369994	A6	RU	2016
	1965	MT369995	A6	RU	2016
	1966	MT369998	A6	RU	2016
	1967	OQ979187	A6	RU	2016
	1968	OP056071	A6	RU	2017
	1969	MT334918	A6	RU	2017
	1970	MT369968	A6	RU	2017
	1971	MT369999	A6	RU	2017
	1972	MT370000	A6	RU	2017
	1973	MT370001	A6	RU	2017
	1974	MT370005	A6	RU	2017
	1975	MT370006	A6	RU	2017
	1976	MZ427726	A6	RU	2017
	1977	MZ427757	A6	RU	2017
	1978	MZ427756	A6	RU	2017
	1979	MZ427758	A6	RU	2017
	1980	MZ427759	A6	RU	2017
	1981	MZ427762	A6	RU	2017
	1982	MZ427766	A6	RU	2017
	1983	MZ427767	A6	RU	2017
	1984	MZ427720	A6	RU	2018
	1985	MZ327293	A6	RU	2018
	1986	MZ427764	A6	RU	2018
	1987	MZ427765	A6	RU	2018
	1988	MZ427769	A6	RU	2018
	1989	MZ427771	A6	RU	2018
	1990	MZ427749	A6	RU	2019
	1991	MZ427731	A6	RU	2019
	1992	MZ427734	A6	RU	2019
	1993	MZ427744	A6	RU	2019
	1994	MZ427743	A6	RU	2019
	1995	MZ427738	A6	RU	2019
	1996	MN736699	A6	SI	2009
	1997	AF413987	A6	UA	2000
	1998	DQ823358	A6	UA	2001
[truncated: 2,965 more rows]
