# Supplementary material for: Rev Protein Diversity in HIV-1 Group M Clades
Source: Viruses. 2024 May 10;16(5):759. doi: 10.3390/v16050759 (PMC11125641; doi:10.3390/v16050759)
Supplement: Supplementary file 1 [file viruses-16-00759-s001.zip › Table S3_Revised.xlsx]

## Sheet: Лист1
Supplementary Table S3. Matrix of P-values for the pairwise comparisons of the amino acid diversity within difference HIV-1 clades.
	A1	A6	B	C	D	F1	F2	G	H	01_AE	02_AG	06_cpx	07_BC	08_BC	11_cpx	12_BF	13_cpx	14_BG	22_01A1	35_A1D	42_BF1	63_02A6	71_BF1	85_BC	91_cpx	103_01B
A1
A6	1e-08
B	1e-08	1e-08
C	1e-08	1e-08	1e-08
D	1e-08	1e-08	1e-08	1e-08
F1	1e-08	1e-08	1e-08	1e-08	1e-08
F2	0.0141876	1e-08	1e-08	0.089984	1e-08	0.309195
G	1e-08	1e-08	1e-08	1e-08	1e-08	1e-08	1e-08
H	0.00149862	1e-08	0.340751	1e-08	1e-08	0.00014363	1.66e-06	0.361017
01_AE	1e-08	1e-08	1e-08	1e-08	1e-08	1e-08	9.7e-07	1e-08	1e-08
02_AG	1e-08	1e-08	1e-08	1e-08	1e-08	1e-08	0.00119411	1e-08	0.00234992	1e-08
06_cpx	1e-08	1e-08	1e-08	4.528e-05	0.0104079	1e-08	3.09e-05	1e-08	1e-08	0.409212	1e-08
07_BC	1e-08	0.0505792	1e-08	1e-08	1e-08	1e-08	1e-08	1e-08	1e-08	1e-08	1e-08	1e-08
08_BC	1e-08	1e-08	1e-08	1e-08	1e-08	1e-08	1e-08	1e-08	1e-08	1e-08	1e-08	1e-08	1e-08
11_cpx	1e-08	1e-08	0.0104205	1e-08	1e-08	1e-08	1e-08	0.246828	0.746743	1e-08	1e-08	1e-08	1e-08	1e-08
12_BF	1e-08	1e-08	1e-08	0.0001337	0.0438422	1e-08	1.376e-05	1e-08	1e-08	0.348307	1e-08	0.939179	1e-08	1e-08	1e-08
13_cpx	0.0259464	1e-08	4e-08	0.495833	6.01e-06	0.260281	0.578902	1.1e-06	5.05e-06	0.00325237	0.00498304	0.00379158	1e-08	1e-08	3.16e-06	0.00140477
14_BG	1e-08	1e-08	1e-08	1e-08	1e-08	1e-08	1e-08	1e-08	1e-08	1e-08	1e-08	1e-08	1e-08	0.00030156	1e-08	1e-08	1e-08
22_01A1	0.252167	1e-08	1e-08	0.00199416	1e-08	0.804414	0.223605	1.13e-06	0.00018088	1e-08	0.0724796	7e-07	1e-08	1e-08	6.12e-06	3.1e-07	0.153526	1e-08
35_A1D	1e-08	1e-08	1e-08	1e-08	1e-08	1e-08	1e-08	1e-08	1e-08	1e-08	1e-08	1e-08	1e-08	6e-08	1e-08	1e-08	1e-08	1e-08	1e-08
42_BF1	1e-08	1e-08	1e-08	1e-08	1e-08	1e-08	1e-08	1e-08	1e-08	1e-08	1e-08	1e-08	1e-08	1e-08	1e-08	1e-08	1e-08	1e-08	1e-08	1e-08
63_02A6	1e-08	1e-08	1e-08	1e-08	1e-08	1e-08	1e-08	1e-08	1e-08	1e-08	1e-08	1e-08	1e-08	0.033337	1e-08	1e-08	1e-08	0.00122126	1e-08	0.0653218	1e-08
71_BF1	0.0456136	1e-08	1e-08	0.0412166	1e-08	0.573597	0.761195	1e-08	1e-08	2.8e-07	0.0062468	1.137e-05	1e-08	1e-08	2.2e-07	5.65e-06	0.430376	1e-08	0.391334	1e-08	1e-08	1e-08
85_BC	1e-08	2.38e-06	1e-08	1e-08	1e-08	1e-08	1e-08	1e-08	1e-08	1e-08	1e-08	1e-08	1.714e-05	0.645126	1e-08	1e-08	1e-08	0.0016722	1e-08	0.0110932	1e-08	0.284369	1e-08
91_cpx	1e-08	1e-08	1e-08	1e-08	1e-08	1e-08	1e-08	1e-08	1e-08	1e-08	1e-08	1e-08	1e-08	1e-08	1e-08	1e-08	1e-08	0.0630359	1e-08	1e-08	1e-08	1e-08	1e-08	9e-08
103_01B	1e-08	0.318108	1e-08	1e-08	0.00034398	1e-08	1e-08	1e-08	1e-08	1e-08	1e-08	4.29e-06	0.167294	3.046e-05	1e-08	3.53e-06	1e-08	5.79e-06	1e-08	0.0367614	1e-08	0.0220088	1e-08	0.00063601	1e-08
The statistical significance of differences was assessed using by a Mann-Whitney U-test with Bonferroni multiple-test correction (p = α/m, with α = 0.05, m = 650 tests).
