# Supplementary material for: Rev Protein Diversity in HIV-1 Group M Clades
Source: Viruses. 2024 May 10;16(5):759. doi: 10.3390/v16050759 (PMC11125641; doi:10.3390/v16050759)
Supplement: Supplementary file 1 [file viruses-16-00759-s001.zip › Table S5_Revised.xlsx]

## Sheet: Лист1
Supplementary Table S5. Matrix of P-values for the pairwise comparisons of the Rev amino acid residue with a conservation >91% within difference HIV-1 clades.
	A1	A6	B	C	D	F1	F2	G	H	01_AE	02_AG	06_cpx	07_BC	08_BC	11_cpx	12_BF	13_cpx	14_BG	22_01A1	35_A1D	42_BF1	63_02A6	71_BF1	85_BC	91_cpx	103_01B
A1
A6	0.29072
B	0.89553	0.182048
C	0.787206	0.490633	0.586329
D	0.0783363	0.577283	0.0548569	0.15971
F1	0.351631	0.891696	0.280061	0.579291	0.48137
F2	0.179682	0.890378	0.134634	0.328656	0.775829	0.780475
G	0.796116	0.148739	0.89681	0.502671	0.0315759	0.186316	0.0833584
H	0.364601	0.0471385	0.597218	0.225434	0.00995562	0.0818634	0.031176	0.605055
01_AE	0.695081	0.593871	0.508774	0.892496	0.217535	0.686717	0.415683	0.435416	0.189476
02_AG	0.36852	0.0372562	0.515404	0.184851	0.0052791	0.0496461	0.0176811	0.608394	1	0.15554
06_cpx	0.138793	0.782068	0.101752	0.263104	0.886336	0.67488	1	0.0614912	0.0217482	0.340772	0.0120608
07_BC	0.278808	1	0.214976	0.569011	0.563768	1	0.886498	0.174746	0.0564516	0.582953	0.0439862	0.774503
08_BC	0.01123	0.147356	0.00683462	0.0386396	0.45102	0.107608	0.235148	0.00340098	0.00075133	0.0338955	0.00035779	0.296445	0.174775
11_cpx	0.508013	0.684442	0.419859	0.782489	0.327499	0.890818	0.579605	0.292698	0.142378	0.893642	0.0902565	0.487262	0.778823	0.0594845
12_BF	0.105265	0.67708	0.0754518	0.206897	1	0.574635	0.887218	0.0445016	0.0148685	0.27468	0.00806274	1	0.666243	0.368325	0.402939
13_cpx	0.698707	0.115862	0.896071	0.422227	0.0226958	0.14688	0.0628182	1	0.698253	0.363581	0.701003	0.0456249	0.136325	0.00222416	0.237456	0.0325024
14_BG	6.945e-05	0.00502679	3.065e-05	0.00033976	0.0311121	1	0.0100062	1.314e-05	9e-07	0.00053176	6.3e-07	0.014817	0.00557658	0.192387	0.00113822	0.0216273	7.35e-06
22_01A1	0.356366	1	0.2307	0.582247	0.487552	1	1	0.190227	0.0644207	0.689979	0.0512745	0.679232	1	0.112763	0.786958	0.580043	0.150336	0.00329472
35_A1D	0.184412	0.891797	0.23073	0.332161	0.778884	0.681268	0.8888	0.0864531	0.0239001	0.421226	0.0186414	1	0.779288	0.241591	0.495912	0.888786	0.0653779	0.011233	0.786233
42_BF1	1e-08	1.3e-07	1e-08	1e-08	2.88e-06	4e-08	3.7e-07	1e-08	1e-08	1e-08	1e-08	7.4e-07	1.8e-07	0.00016073	1e-08	1.47e-06	1e-08	0.0164576	6e-08	5.2e-07
63_02A6	0.00386432	0.0881531	0.00145662	0.0139412	0.301528	0.0618115	0.145584	0.0010652	0.00012867	0.0177921	9.45e-05	0.188255	0.0772546	0.876257	0.0238065	0.239969	0.00067452	0.338214	0.0657964	0.151795	0.00047049
71_BF1	0.179682	0.890378	0.134634	0.0139412	0.775829	0.780475	1	0.0833584	0.031176	0.415683	0.0176811	1	0.886498	0.235148	0.579605	0.887218	0.0628182	0.0100062	0.78353	1	3.7e-07	0.145584
85_BC	0.278808	1	0.214976	0.328656	0.563768	1	0.886498	0.174746	0.0564516	0.582953	0.0439862	0.774503	1	0.174775	0.778823	0.666243	0.136325	0.00557658	1	0.779288	1.8e-07	0.0772546	0.886498
91_cpx	0.00856664	0.153014	0.00512783	0.0293494	0.458367	0.112256	0.242071	0.00255467	0.00055582	0.0354493	0.00025832	0.303826	0.138869	1	0.0625611	0.375873	0.0016605	0.201216	0.117452	0.198886	0.00021421	0.878847	0.242071	0.138869
103_01B	0.29072	1	0.182048	0.490633	0.577283	0.891696	0.890378	0.148739	0.0471385	0.593871	0.0372562	0.782068	1	0.147356	0.684442	0.67708	0.115862	0.00502679	1	0.8918	1.3e-07	0.0881531	0.890378	1	0.153014
The statistical significance of differences was assessed using by a Fisher's exact test with Bonferroni multiple-test correction (p = α/m, with α = 0.05, m = 650 tests).
